## RESEARCH ARTICLE

# The role of the diencephalon in the guidance of thalamocortical axons in mice

Idoia Quintana-Urzaínqui<sup>1,\*</sup>, Pablo Hernández-Malmierca<sup>2,3</sup>, James M. Clegg<sup>1</sup>, Ziwen Li<sup>4</sup>, Zrinko Kozić<sup>1</sup> and David J. Price<sup>1</sup>

## ABSTRACT

Thalamocortical axons (TCAs) cross several tissues on their journey to the cortex. Mechanisms must be in place along the route to ensure they connect with their targets in an orderly fashion. The ventral telencephalon acts as an instructive tissue, but the importance of the diencephalon in TCA mapping is unknown. We report that disruption of diencephalic development by Pax6 deletion results in a thalamocortical projection containing mapping errors. We used conditional mutagenesis to test whether these errors are due to the disruption of pioneer projections from prethalamus to thalamus and found that, although this correlates with abnormal TCA fasciculation, it does not induce topographical errors. To test whether the thalamus contains navigational cues for TCAs, we used slice culture transplants and gene expression studies. We found the thalamic environment is instructive for TCA navigation and that the molecular cues netrin 1 and semaphorin 3a are likely to be involved. Our findings indicate that the correct topographic mapping of TCAs onto the cortex requires the order to be established from the earliest stages of their growth by molecular cues in the thalamus itself.

**KEY WORDS:** Thalamocortical tract, Axon guidance, Diencephalon, Pax6, Thalamus, Prethalamic pioneer axons

## INTRODUCTION

A striking feature of the axonal tracts that interlink the component parts of the nervous system is the high degree of order with which they map the array of neurons in one structure onto the array of neurons in their target. Often, the order of axons at the target closely mirrors that at the source. An excellent example is the mapping of thalamic neurons onto their cerebral cortical targets via the thalamocortical pathway (Fig. 1A). Thalamic neurons located at one end of the thalamus in a dorsolateral region called the dorsal lateral geniculate nucleus (dLGN) innervate the caudal (visual) part of cortex; neurons located at the other end of the thalamus in more rostral-medial regions known as the ventrolateral (VL) and ventromedial (VM) nuclei innervate more rostral cortical

regions, including motor and frontal cortex; neurons located in between – in the ventromedial posterior (VMP) nuclei – innervate central (somatosensory) cortex (Fig. 1A) (Amassian and Weiner, 1966; Bosch-Bouju et al., 2013; Jones, 2007; Tlamsa and Brumberg, 2010). The mechanisms that generate this orderly topographic mapping remain poorly understood.

The maintenance of order among thalamic axons as they grow is likely to contribute to the generation of orderly topographic mapping in the mature thalamocortical tract. During embryogenesis, thalamic axons exit the thalamus from about E12.5 onwards (Auladell et al., 2000; Braisted et al., 1999; Tuttle et al., 1999), approximately coincident with the cessation of neurogenesis in this structure (Angevine, 1970; Li et al., 2018). They then cross the adjacent prethalamus and turn laterally out of the diencephalon and into the ventral telencephalon where they traverse two consecutive instructive regions – the corridor (López-Bendito et al., 2006) and the striatum – before entering the cortex. There is evidence that the maintenance of spatial order among thalamocortical axons (TCAs) crossing the ventral telencephalon requires interactions between the axons and signals released by cells they encounter in this region (Bielle et al., 2011; Bonnin et al., 2007; Braisted et al., 1999; Dufour et al., 2003; Molnár et al., 2012; Powell et al., 2008). The importance of earlier interactions within the diencephalon remains unclear.

Here, we have tested the effects of mutating the gene for the Pax6 transcription factor, which is essential for normal diencephalic patterning (Caballero et al., 2014; Clegg et al., 2015; Parish et al., 2016; Pratt et al., 2000; Stoykova et al., 1996; Warren and Price, 1997), on the topographic mapping of TCAs onto the cortex. Pax6 starts to be expressed in the anterior neural plate well before TCAs start to form (Walther and Gruss, 1991). As the forebrain develops from the anterior neural plate, Pax6 expression becomes localized in: (1) cortical progenitors that generate the target neurons for TCAs; (2) diencephalic (thalamic and prethalamic) progenitors; and (3) prethalamic (but not thalamic) postmitotic neurons (Quintana-Urzaínqui et al., 2018; Stoykova et al., 1996; Warren and Price, 1997). We discovered that deletion of Pax6 from mouse embryos at the time when thalamic axons are starting to grow results in the development of a thalamocortical projection containing mapping errors. Axons from dorsolateral thalamus are misrouted medially and end up projecting abnormally rostrally in the cortex. We went on to explore the reasons for this defect.

We first used conditional mutagenesis to test whether misrouting is due to the loss of Pax6 from prethalamic neurons, as previous work has shown that: (1) Pax6 is not required in the cortex for normal TCA topography (Piñon et al., 2008); and (2) Pax6 is neither expressed nor required autonomously by thalamic neurons for them to acquire the ability to extend axons to the cortex (Clegg et al., 2015). We found that although loss of Pax6 from a specific set of prethalamic neurons prevented them developing their normal axonal projections to thalamus and resulted in the abnormal fasciculation of thalamic axons, it did not cause TCAs to misroute.

<sup>1</sup>Centre for Discovery Brain Sciences, Hugh Robson Building, George Square, Edinburgh EH8 9XD, UK. <sup>2</sup>Heidelberg Institute for Stem Cell Technology and Experimental Medicine (HI-STEM), 69120 Heidelberg, Germany. <sup>3</sup>Division of Stem Cells and Cancer, Deutsches Krebsforschungszentrum (DKFZ) and DKFZ-ZMBH Alliance, 69120 Heidelberg, Germany. <sup>4</sup>Centre for Cardiovascular Science, Queen's Medical Research Institute, 47 Little France Crescent, Edinburgh EH16 4TJ, UK.

\*Author for correspondence (idoia.quintana@ed.ac.uk)

 I.Q.-U., 0000-0002-9297-7331

This is an Open Access article distributed under the terms of the Creative Commons Attribution License (<https://creativecommons.org/licenses/by/4.0>), which permits unrestricted use, distribution and reproduction in any medium provided that the original work is properly attributed.

Handling Editor: François Guillemot  
Received 9 September 2019; Accepted 2 June 2020

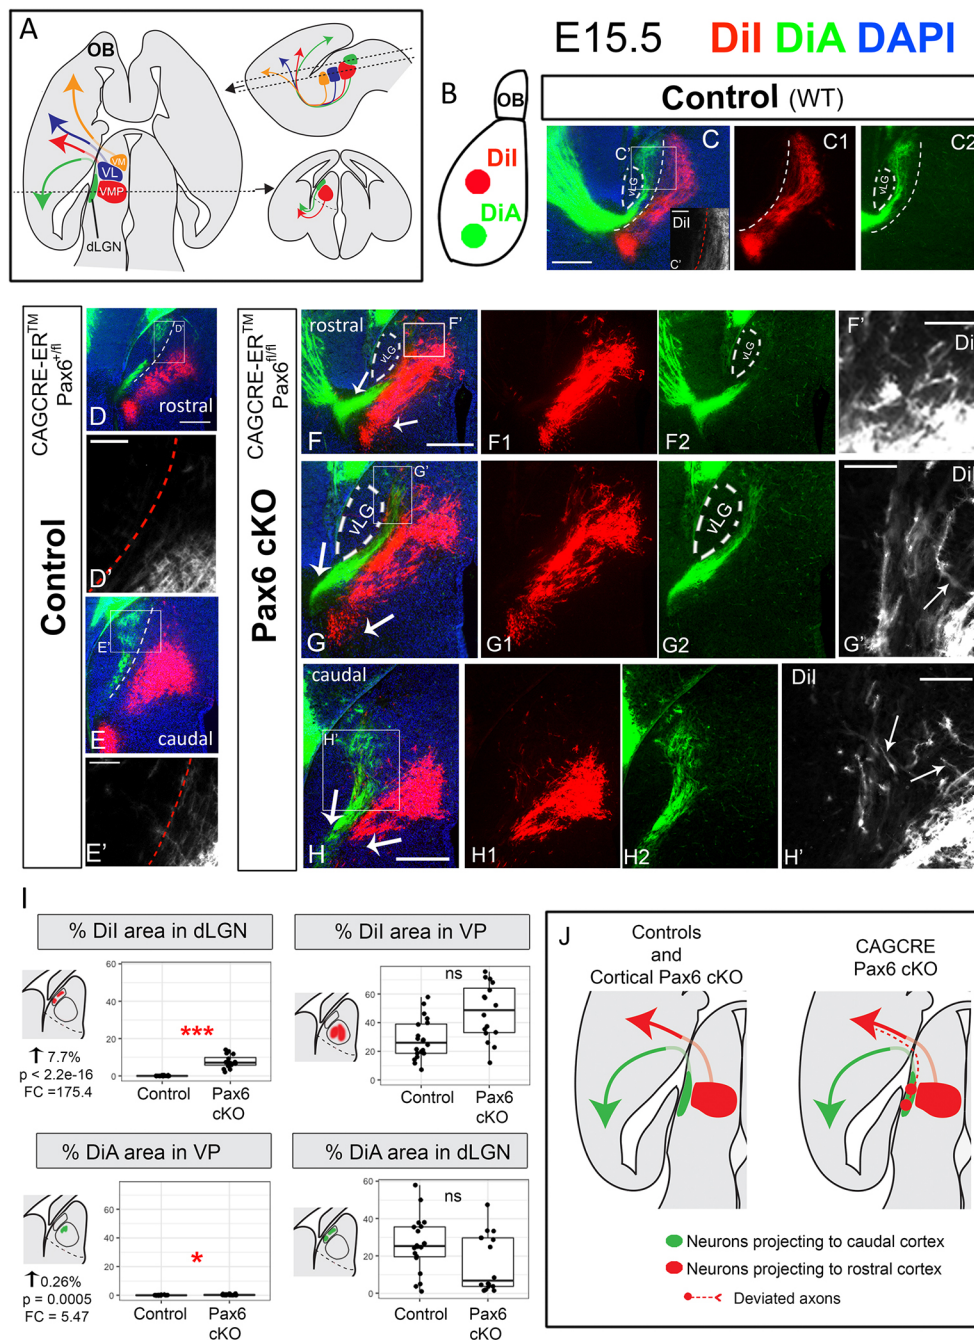

**Fig. 1. Ubiquitous conditional Pax6 deletion at E9.5 causes mapping errors in the thalamocortical connection.**

(A) Thalamic axons map to specific areas of the cortex via the thalamocortical pathway. (B) Schematic showing the cortical location where the tracers were placed. (C-H') Transverse sections showing axons retrogradely labelled with Dil and DiA. Although in controls (C, C', C1, C2, D, D', E, E') the areas labelled in the thalamus were clearly separated (dotted lines), in *CAG<sup>CreER</sup> Pax6* cKOs (F-H') they overlapped, indicating the existence of mapping errors in these mutants. Arrows in F-H indicate the thalamocortical bundle segregating in visual (green) and somatosensory (red) halves at the level of the exit of the bundle from the diencephalon. (C', D', E', F', G', H') High-power images of the boxed areas in C, D, E, F, G, H, respectively. Arrows in G' and H' indicate Dil-labelled axons with abnormal trajectories towards medial thalamic regions. (I) Box plots showing the area occupied by each tracer (Dil or DiA) in each defined area (dLGN or VP) in controls versus Pax6 cKOs. Seven E15.5 embryos (four controls and three Pax6 cKOs), from three different litters were analysed. For each embryo, at least five rostrocaudal sections were quantified. In the box plots, the ends of the whiskers represent minimum and maximum values; the bottom of the box is the first quartile, the middle horizontal line is the median and the top of the box is the third quartile. Each dot represents an area value of a single section. *P* values were calculated by fitting the data to a generalized mixed linear model and the nested factors litter:embryo were considered as biological replicates (*n*=3). \**P*<0.001, \*\*\**P*<1.0 e<sup>-15</sup>. (J) Summary of the tract tracing results. Scale bars: 200 μm in C, C1, C2, D, E, F, F1, F2, G, G1, G2, H, H1, H2; 50 μm in C', D', E', F', G', H'. dLGN, dorsal lateral geniculate nucleus; FC, fold change; OB, olfactory bulb; VL, ventral lateral nucleus; vLG, ventral lateral geniculate nucleus; VM, ventral medial nucleus; VMP, ventral medial posterior nucleus; VP, ventral posterior; vTel, ventral telencephalon; WT, wild type.

This suggested that the thalamus itself contains important navigational cues for TCAs. We used slice culture transplants and gene expression studies to show: (1) that the thalamic environment is indeed instructive for TCA navigation; and (2) to identify molecular changes within the thalamus that likely cause the disruption in TCA topography observed upon Pax6 deletion. Our findings indicate that the normal topographic mapping of TCAs requires that order be established and maintained from the earliest stages of their growth by molecular cues in the thalamus itself.

## RESULTS

### Thalamocortical topography is disrupted in *CAG<sup>CreER</sup> Pax6* but not in *Emx<sup>CreER</sup> Pax6* conditional knockouts

Previous studies have shown that constitutive loss of Pax6 function causes a total failure of TCA development, which is hypothesized to

be a secondary consequence of anatomical disruption at the interface between the diencephalon and the telencephalon (Clegg et al., 2015; Georgala et al., 2011; Jones et al., 2002). No such failure occurs if Pax6 is deleted conditionally after this anatomical link is formed (Clegg et al., 2015). We first assessed whether delayed ubiquitous Pax6 deletion, induced in *CAG<sup>CreER-*TM*</sup> Pax6<sup>*fl/fl*</sup>* embryos (referred to here as *CAG<sup>CreER</sup> Pax6* cKOs), disrupts the topography of TCA connections. We induced Cre recombinase activation by tamoxifen administration at E9.5, which caused Pax6 protein loss in *CAG<sup>CreER</sup> Pax6* cKOs from E11.5 onwards (Quintana-Urzaínqui et al., 2018), which is when the generation of most thalamic neurons is starting (Li et al., 2018) and before many TCAs have begun to grow (Auladell et al., 2000; López-Bendito and Molnár, 2003). Diencephalic progenitor domains in *CAG<sup>CreER</sup> Pax6* cKOs are fully recognizable (Quintana-Urzaínqui

et al., 2018) and patterning seems largely unaffected in the thalamus (Fig. S1). We used both wild-type and *CAG<sup>CreER</sup>Pax6<sup>fl/+</sup>* littermate embryos as controls because the latter express normal levels of Pax6 protein (see Materials and Methods; Caballero et al., 2014; Manuel et al., 2015).

We inserted two different axonal tracers in two cortical areas in E15.5 fixed brains. DiA was placed in the visual (caudal) cortex, while DiI was placed in the somatosensory (more rostral) cortex (Fig. 1B). In controls (both wild type and *Pax6<sup>fl/+</sup>*), DiA retrogradely labelled cells in dorsolateral thalamic areas (dLGN; green labelling in Fig. 1C-E), while DiI labelled cells in ventromedially located thalamic regions, identified as ventral-posterior thalamic nucleus (VP) (red labelling in Fig. 1C-E). Labelling of these two thalamic regions was clearly separated in all cases (indicated by dotted line in Fig. 1C-E). In *CAG<sup>CreER</sup> Pax6* cKOs, however, the two labelled populations overlapped (Fig. 1F-H). In these mutants, the distribution of the DiA-labelled thalamic cells (from caudal cortical injections) was not obviously changed with respect to controls. However, the DiI-labelled thalamic cells (projecting to more rostral cortical areas) showed a much wider distribution than in controls and expanded to lateral thalamic areas (compare Fig. 1C-E,C'-E' with F-H,F'-H'), even overlapping with DiA stained cells at the dLGN (Fig. 1G,H,G',H'). To quantitate this, we measured the area occupied by DiI and DiA within each nucleus of interest in controls versus *CAG<sup>CreER</sup> Pax6* cKOs (in transverse E15.5 sections from three different litters: four controls, three cKOs; five sections per embryo). We defined the dLGN and VP nucleus as regions of interest (ROIs) blind to DiI/DiA labelling and measured the percentage of each ROI occupied by DiI and DiA (for details, see Materials and Methods). We found highly significant increase (from virtually 0% to 7.7%) of the area occupied by DiI in the dLGN in mutants compared with controls (Fig. 1I). We also found a significant increase in DiA in VP nucleus, although its magnitude was very small (0.26%) (Fig. 1I). Areas occupied by DiI in VP or DiA in dLGN were not significantly altered. This analysis shows that *CAG<sup>CreER</sup> Pax6* cKOs display topographic errors, the main one being the misrouting of axons from dLGN neurons towards abnormally rostral cortical areas in the *CAG<sup>CreER</sup> Pax6* cKOs.

As Pax6 is expressed both in the cortex and diencephalon during TCA development, the mapping defects described above might have been due to the loss of Pax6 from the cortex. This was unlikely because a previous study showed that Pax6 is not required in the cortex for the establishment of proper topographical thalamocortical connections (Piñon et al., 2008). To confirm this, we used a cortex-specific, tamoxifen-inducible Cre line (*Emx1<sup>CreER</sup>*). We administered tamoxifen at E9.5, which results in a near-complete loss of cortical Pax6 between E11.5 and E12.5 (Georgala et al., 2011; Mi et al., 2013), and performed DiI/DiA labelling at E15.5, following the same experimental design described above for the *CAG<sup>Cre</sup>* line. We found that the two retrogradely labelled populations did not overlap in controls (*Emx1<sup>CreER</sup> Pax6<sup>fl/+</sup>*) or in mutants (*Emx1<sup>CreER</sup> Pax6<sup>fl/fl</sup>*) (Fig. S2A,B), suggesting that the defects of TCA mapping found in the *CAG<sup>CreER</sup> Pax6* cKOs were not attributable to cortical abnormalities.

To define the anatomical region where thalamic axons probably deviated from ordered growth, we examined the TCA bundle in *CAG<sup>CreER</sup>Pax6* cKOs. This bundle was ordered and segregated into rostral/somatosensory (DiI) and caudal/visual (DiA) halves at its point of exit from the prethalamus and entry into the ventral telencephalon (arrows in Fig. 1F-H), which indicated that the misrouting of lateral TCAs from dorsolateral thalamus might happen before this point, i.e. within the diencephalon.

### TCAs fasciculate prematurely as they cross the prethalamus in *Pax6* conditional mutants

Within the diencephalon, the first structure that thalamic axons encounter as they leave the thalamus is the prethalamus, and its neurons normally express high levels of Pax6. Therefore, we investigated whether the defects of TCA mapping in *CAG<sup>CreER</sup> Pax6* cKOs might arise from a disordered growth of thalamic axons through the prethalamus. As a first step, we examined the effects of Pax6 deletion on the behaviour of thalamic axons as they cross the prethalamus.

As the neural cell adhesion molecule L1CAM (L1) is expressed in TCAs (Fukuda et al., 1997; Ohshima et al., 2004), we examined the distribution of L1-positive thalamic axons at E13.5 in transverse and sagittal sections through the prethalamus. In controls, axons emerging from the thalamus converge progressively as they cross the prethalamus (Fig. 2A-E) to subsequently form a single thalamocortical bundle that turns laterally and exits the prethalamus (arrows in Fig. 2A,B,E). We found that, in *CAG<sup>CreER</sup> Pax6* cKOs (Fig. 2F-L), thalamic axons prematurely converge into larger bundles as soon as they cross the thalamic-prethalamic boundary (open arrows in Fig. 2G-I,L).

To obtain a quantitative measurement of this observation, we positioned three equally spaced lines across different diencephalic levels in sagittal sections (see Materials and Methods; lines represented in Fig. 2D,E,K,L). We used Fiji software (Schindelin et al., 2012) to quantify the number of axon bundles crossing each line and the width of each individual bundle. We recognized individual bundles as each single L1-positive structure above a consistent intensity threshold (red lines in Fig. 2M,N). We found a significant decrease in the number of bundles crossing all three checkpoints (Fig. 2O). Axon bundle width strikingly increased at the Th-PTh border and the mid-PTh, with no significant change at the low-PTh checkpoint line (Fig. 2P) (see figure legend for statistical details). These data indicate that, in the absence of Pax6, TCAs begin to fasciculate prematurely in their route, forming bigger and fewer bundles as they cross the prethalamus (Fig. 2Q). We next tested the role of the prethalamus in TCA formation and the potential establishment of their topography.

### Loss of prethalamus pioneer axons correlates with abnormal TCA fasciculation but not with changes in topography

The prethalamus has been proposed to host a population of neurons that extend axons to the thalamus and act as 'pioneer guides' for TCA navigation (Price et al., 2012; Tuttle et al., 1999). We assessed whether this population is disrupted by Pax6 loss from the prethalamus because, if it is, this might provide an explanation for phenotypes described above.

From E9.5 onwards, most cells in the prethalamus express, or are derived from, cells that express *Gsx2*. We used a *Gsx2<sup>Cre</sup>* line (Kessaris et al., 2006) carrying an EGFP Cre reporter (Sousa et al., 2009) to visualize neurons and axons belonging to the *Gsx2* lineage and we observed that prethalamic Pax6-expressing cells are included within the location of the *Gsx2* lineage prethalamic population (Fig. 3A,B). *Zic4* is also expressed by some prethalamic cells, with an onset of expression similar to that of *Gsx2* (about E9.5; Gaston-massuet et al., 2005), and most diencephalic *Zic4* lineage cells express and require Pax6 for their normal development (Li et al., 2018). Using a *Zic4<sup>Cre</sup>* line (Rubin et al., 2011), we observed that prethalamic neurons derived from *Zic4* lineage were located in a narrow band close to the thalamic-prethalamic border (Fig. 3C,D). We assessed whether these prethalamic populations normally send axons to the thalamus.

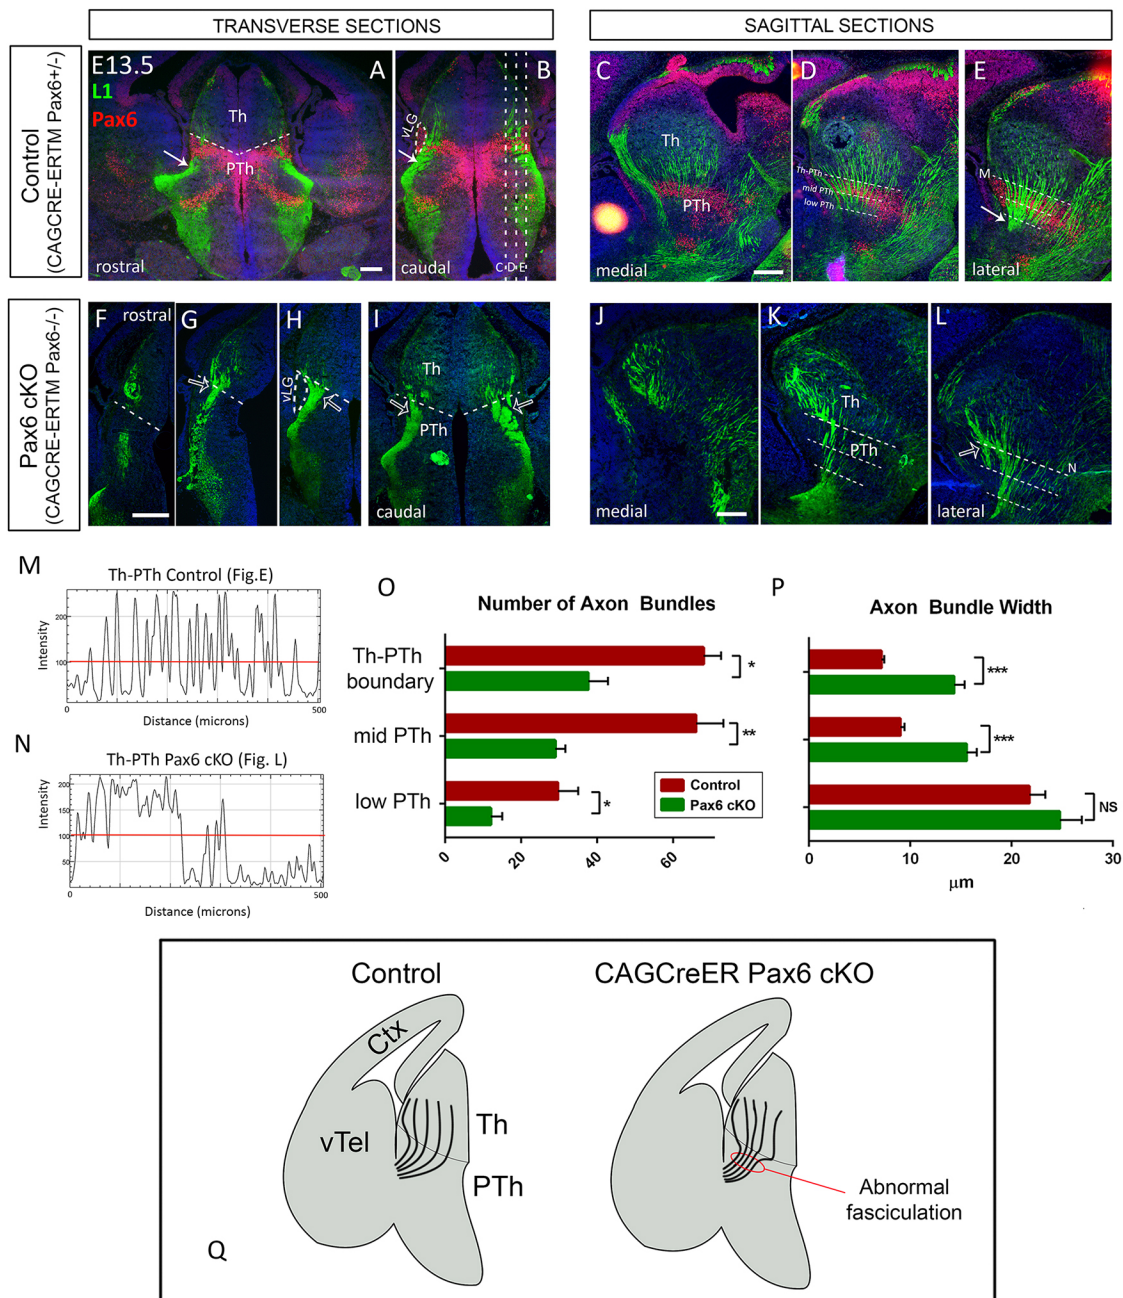

**Fig. 2. Thalamic axons exhibit abnormal fasciculation as they cross the prethalamus in CAG<sup>CreER</sup> Pax6 cKOs.** (A-L) Transverse (A,B,F-I) and sagittal (C-E,J-L) sections showing immunofluorescence for L1 and Pax6 in controls (A-E) and CAG<sup>CreER</sup> Pax6 cKOs (F-L) at E13.5. White arrows in A,B,E indicate the point at which the thalamocortical tract forms a single bundle and exits the diencephalon in controls. Arrows in G-I,L indicate thalamic axons converging prematurely into big bundles as soon as they cross the thalamic-prethalamic boundary in Pax6 cKOs. Dashed lines in A,F-I mark the thalamic-prethalamic boundary. Dashed lines in B mark the level of sections in C-E. Dashed lines in D,E,K,L indicate the position of the lines used to quantify the number and width of bundles crossing the prethalamus. (M,N) Examples of the measurements taken for the quantification, which correspond to lines indicated in E and L. Individual bundles were identified as a single L1-positive structure above a consistent intensity threshold (red lines). (O,P) Quantification of the number (O) and width (P) of axon bundles crossing each reference line and the statistical significance. Data are mean±s.e.m. (\* $P \leq 0.05$ , \*\* $P \leq 0.01$  and \*\*\* $P \leq 0.001$ ; two-tailed unpaired Student's *t*-test;  $n=3$  embryos from three different litters). (O) We found significant decrease in the number of bundles crossing all three checkpoints (Th-PTh boundary:  $P=0.046$ ,  $t=2.86$ , d.f.=4; Mid PTh:  $P=0.0085$ ,  $t=4.82$ , d.f.=4; low-PTh:  $P=0.012$ ,  $t=4.39$ , d.f.=4). (P) We detected a big increase in axon bundle width at the Th-PTh border (\*\*\* $P < 0.001$ ,  $t=9.12$ , d.f.=443) and the mid-PTh (\*\*\* $P < 0.001$ ,  $t=7.21$ , d.f.=350), but no significant change (NS) at the low-PTh. (Q) Summary of the results showing how thalamic axons undergo abnormal and premature fasciculation when crossing the prethalamus in CAG<sup>CreER</sup> Pax6 cKOs. Scale bars: 200  $\mu\text{m}$ . Ctx, cortex; PTh, prethalamus; Th, thalamus; vLG, ventral lateral geniculate nucleus; vTel, ventral telencephalon.

*Gsx2*-lineage GFP-positive axons extended throughout the thalamus forming ordered and parallel projections (Fig. 3E) from E12.5 onwards (Fig. S3). By contrast, *Zic4*-lineage prethalamic cells did not project axons to the thalamus (Fig. 3D), indicating that

prethalamic pioneer axons arise from *Gsx2*-lineage and not from *Zic4*-lineage prethalamic cells.

As *Gsx2* is also expressed in the ventral telencephalon (Fig. 3A), and ventral telencephalic neurons are known to project to the

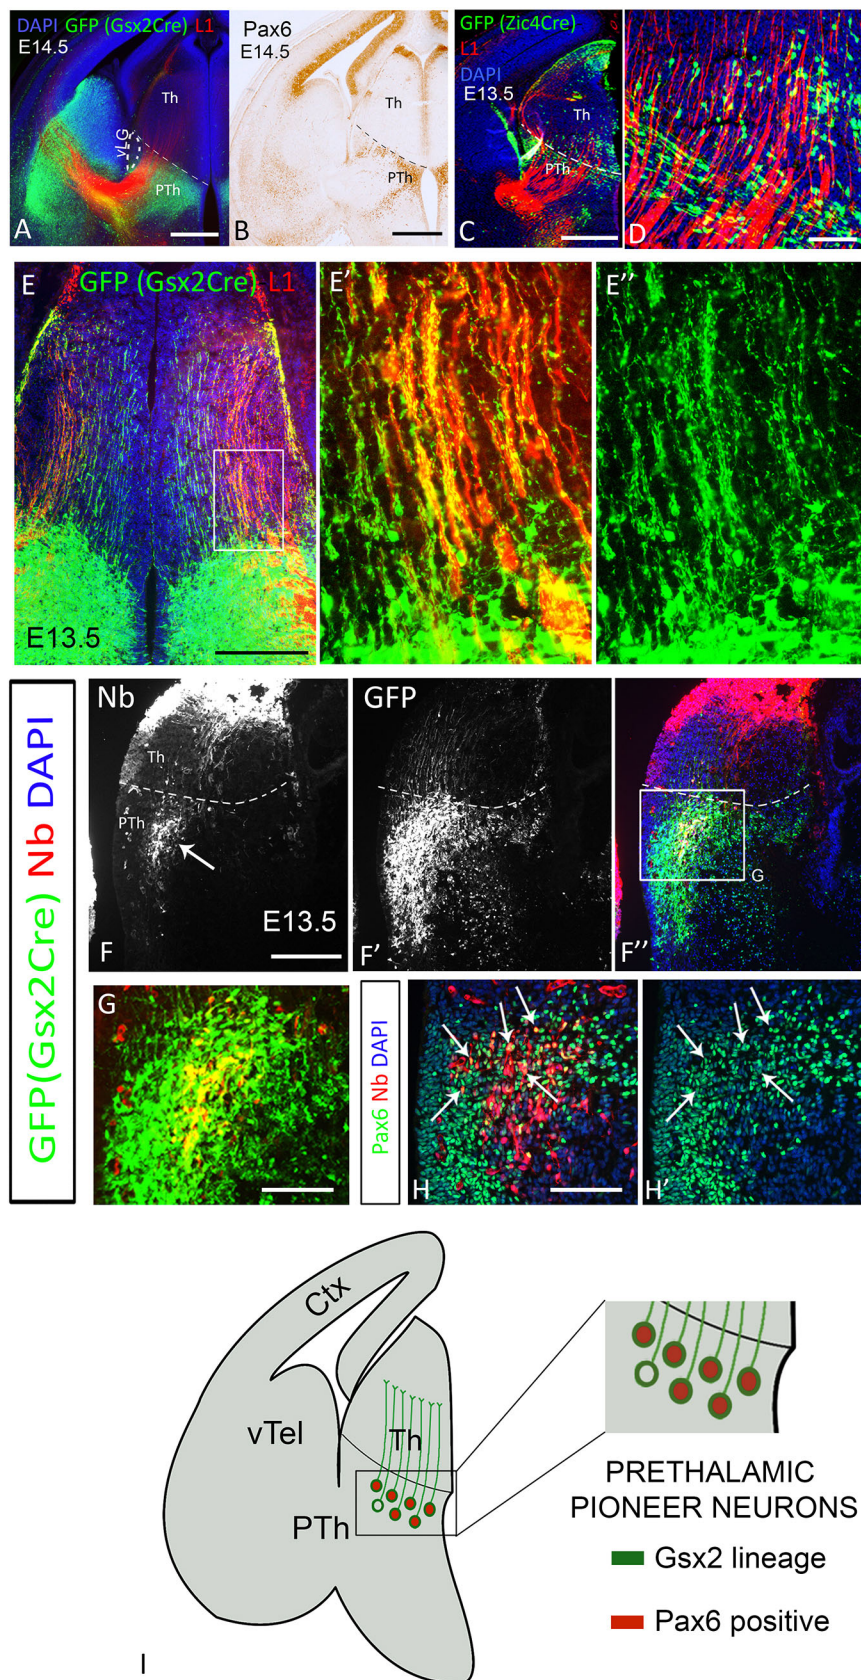

**Fig. 3. Prethalamic pioneer axons belong to the *Gsx2* lineage and express Pax6.** (A) EGFP reporter of Cre recombinase activity and L1 staining in *Gsx2*<sup>Cre</sup> embryos at E14.5. (B) Immunohistochemistry showing Pax6 expression. (C) EGFP reporter of Cre activity in *Zic4*<sup>Cre</sup> embryos at E13.5 and L1 staining. (D) High-power image showing the absence of axonal projections from *Zic4*-lineage prethalamic cells towards the thalamus. (E-E'') Neurons belonging to the *Gsx2* lineage extend parallel projections across the thalamus. E' and E'' are a higher magnification of the area framed in E. (F-F'') Injection of the tracer neurobiotin into the thalamus at E13.5 in the retrogradely labelled neurons in the prethalamus (arrow in F). (F-G) Double labelling of GFP and neurobiotin shows that prethalamic labelled neurons belong to the *Gsx2* lineage. (H,H'') Parallel section of F'' processed for Pax6 immunohistochemistry combined with neurobiotin visualization showing that most prethalamic neurobiotin-positive neurons are also Pax6 positive (arrows). (I) Schematic summary. Scale bars: 500 µm in A-C,E; 250 µm in F-F''; 100 µm in D,E,G-H'. Ctx, cortex; Nb, neurobiotin; PTh, prethalamus; Th, thalamus; vLG, ventral lateral geniculate nucleus; vTel, ventral telencephalon. All descriptions were observed in at least three embryos from three different litters.

thalamus (López-Bendito and Molnár, 2003; Métin and Godement, 1996; Molnár et al., 1998), there was a possibility that *Gsx2*<sup>Cre</sup> lineage axons innervating the thalamus actually originated from

ventral telencephalic neurons. To confirm the existence of *Gsx2*-lineage prethalamic neurons projecting to the thalamus, we injected the neuronal tracer neurobiotin into the thalamus of E13.5 *Gsx2*<sup>Cre</sup>

embryos and successfully labelled prethalamic neurons (arrow in Fig. 3F). Neurobiotin-positive cells were GFP-expressing *Gsx2*-lineage cells (Fig. 3F-F''',G) and most of them also expressed Pax6 (arrows in Fig. 3H,H'; see summary in Fig. 3I). (Note that individual injections each involved only subregions of the thalamus, explaining why each one only labelled a discrete subset of the prethalamic neurons projecting to the thalamus.) This experiment confirmed that *Gsx2*-lineage cells in the prethalamus project to the thalamus.

Having established that pioneer prethalamic axons belong to the *Gsx2* lineage and express Pax6 we next aimed at disrupting their formation by conditionally deleting Pax6 in *Gsx2*-lineage cells. We crossed mice carrying the floxed *Pax6* allele and EGFP Cre reporter

with the *Gsx2*<sup>Cre</sup> line. Pax6 conditional deletion in *Gsx2*-lineage cells (*Gsx2*<sup>Cre</sup> *Pax6* cKOs) caused a visible reduction in the number of GFP-positive axons projecting from prethalamus to thalamus in E12.5, E13.5 and E14.5 embryos (Fig. 4A-F). To confirm that the prethalamic axons that were lost in *Gsx2*<sup>Cre</sup>; *Pax6*<sup>loxP/loxP</sup> embryos were Pax6 expressing, we used the DTy54 YAC reporter allele to express tauGFP in cells in which the *Pax6* gene is active, irrespective of whether it is mutant or not (Tyas et al., 2006). Whereas there were many tauGFP-labelled axons running from prethalamus to thalamus in controls, there were very few in experimental embryos (Fig. 4G-J).

Dil placed in the thalamus of E13.5 *CAG*<sup>CreER</sup> controls (*CAG*<sup>CreER</sup> *Pax6*<sup>fl/+</sup>) retrogradely labelled a prethalamic population (arrow in

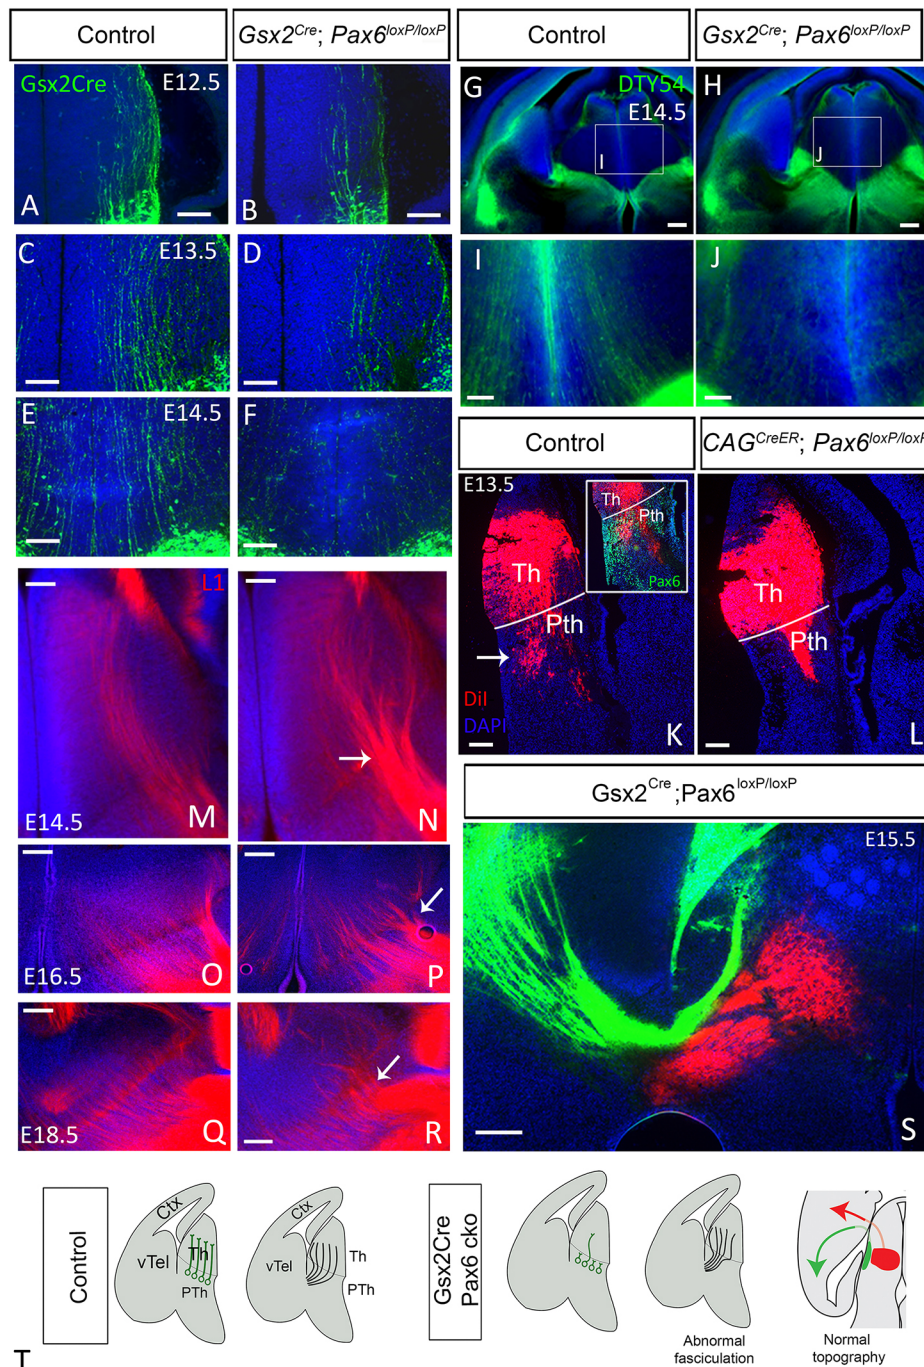

Fig. 4K). In the absence of *Pax6* (*CAG<sup>CreER</sup> Pax6* cKOs), no prethalamic cell bodies were labelled by thalamic DiI injection (Fig. 4L), providing further evidence that the prethalamic pioneer population does not form correctly when *Pax6* is deleted. Overall, our results show that prethalamic pioneer axons originating from *Gsx2*-lineage cells both express and require *Pax6* to develop normal connections with the thalamus (Fig. 4T).

We then studied the TCAs of *Gsx2<sup>Cre</sup> Pax6* cKOs. Similar to the phenotype described in *CAG<sup>CreER</sup> Pax6* cKOs, *Pax6* deletion in *Gsx2* lineage caused abnormal premature fasciculation of axons crossing the thalamic-prethalamic border, as evidenced by L1 immunohistochemistry (Fig. 4M-R). However, unlike *CAG<sup>CreER</sup> Pax6* cKOs, *Gsx2<sup>Cre</sup> Pax6* cKOs did not show abnormal topographical projections, with no obvious overlap between thalamic retrogradely labelled populations after cortical DiI and DiI placement in caudal and more rostral cortex, respectively (Fig. 1B; Fig. 4S). We conclude that, although prethalamic pioneer axons may play a role in avoiding premature TCA fasciculation, they are not required for the establishment of accurate thalamocortical topographic mapping (Fig. 4T).

### Evidence for the importance of navigational cues in the thalamus itself

We next considered the potential importance of thalamic factors in the establishment of thalamocortical topographic order. Our results above indicate that thalamic axons might have deviated from their normal trajectories before they exited the thalamus in *CAG<sup>CreER</sup> Pax6* cKOs (arrows indicate deviant axons in Fig. 1G',H'; no such axons were observed in the controls, Fig. 1C',D',E'). A misrouting of TCAs in the thalamus was also evident with L1 staining (Fig. 5A,B). The largest collections of deviant axons were observed projecting from lateral to medial thalamic regions (arrow in Fig. 5B), suggesting that the loss of *Pax6* had disrupted normal navigational mechanisms operating within the thalamus.

We looked for evidence that thalamic axons are actively guided through the normal thalamus by using *in vitro* slice culture transplants to assess the effects of repositioning lateral or medial thalamic neurons on the routes taken by their axons. We grafted thalamic slice explants from E13.5 GFP-positive donor embryos into GFP-negative host slices and cultured them for 72 h to allow thalamic axons to regrow and navigate through the host environment. The donor grafts were positioned so that their axons had to traverse at least 200  $\mu$ m of host thalamic tissue before encountering the Th-PTh boundary, allowing us to assess how the host thalamic tissue affected the trajectory of the axons emerging from the donor tissue. We isolated donor explants from either lateral or medial thalamus, and grafted them either medially or laterally into host thalamus (Fig. 5C,E,G,I).

We found that axons from lateral thalamic explants showed a strong preference to follow a lateral trajectory, although surprisingly they did not avoid the vLG, as observed in lateral TCAs *in vivo*. Axons from medial explants extended much broadly throughout the thalamus. In both cases, this effect was irrespective of whether they were grafted laterally or medially (Fig. 5C-J). To quantitate this, we divided the thalamus in three equal sectors (lateral, intermediate and medial; Fig. 5K) and measured the area occupied by GFP-positive elements in each of the sectors. We quantified six explants (three lateral and three medial; five sections per explant) from three different litters. On average, 95.7% of axons from lateral explants navigated through lateral-most area (Fig. 5K), while medial explants extended axons more evenly across the three regions (45.8% lateral, 31.8% intermediate and 22.4% medial; Fig. 5K). Moreover, we

observed that when lateral axons were confronted with medial host thalamus, most made a sharp turn towards lateral positions before heading towards the prethalamus (Fig. 5E,F). When medial explants were grafted laterally, many of their axons turned medially (arrows in Fig. 5J).

These results indicated that different subsets of thalamic axons exhibit different chemotactic responses to the thalamic environment and therefore that thalamic axons are actively guided by mechanisms operating within the thalamus itself. To gain further insight into what these mechanisms might be, we went on to examine the expression of guidance molecules in the normal thalamus and in thalamus from which *Pax6* has been removed.

### Axon guidance molecule expression in normal and *Pax6*-deficient thalamus

Semaphorin 3a (*Sema3a*) and netrin 1 (*Ntn1*) are secreted guidance molecules whose complementary gradients of expression in the ventral telencephalon are key for the correct establishment of topographical connections between thalamus and cortex (Bielle et al., 2011; Braisted et al., 1999; Molnár et al., 2012; Powell et al., 2008; Wright et al., 2007). Interestingly, we found that their transcripts are also distributed in opposing gradients in the thalamus (Fig. S4A,B). *Ntn1* is most highly expressed at rostral-medial levels (Fig. S4A), while *Sema3a* is most highly expressed in a more caudal-lateral aspect of the thalamus and in the lateral prethalamus (Fig. S4B). In transverse *in situ* hybridization of E13.5 controls, we observed that *Ntn1* is expressed in a narrow rostral-medial thalamic population of neurons (arrow in Fig. 6A), while *Sema3a* is expressed in caudal-lateral thalamic neurons (arrows in Fig. 6B) as well as flanking the TCA bundles in the prethalamus (open arrow in Fig. 6B).

To obtain a clearer three-dimensional view of these expression patterns, we reconstructed them from serial, adjacent sections stained for *Sema3a*, *Ntn1*, *Pax6* and L1 in controls (Fig. 6C, see Materials and Methods). The 3D reconstruction confirmed that *Sema3a* and *Ntn1* form opposing gradients in the normal embryonic thalamus (Fig. 6C), with *Sema3a* highest at caudal-lateral thalamic levels, while *Ntn1* is highest at rostral-medial thalamic levels.

We next investigated the expression patterns of the main receptors for *Ntn1* and *Sema3a* in the thalamus of control embryos. The most interesting finding was that *Unc5c*, which encodes a *Ntn1* receptor mediating axonal repulsion (Leonardo et al., 1997), was expressed differentially from lateral to medial across the thalamus (Fig. 6D). Laterally, almost all cells expressed high levels of *Unc5c*, whereas medially many cells did not (Fig. 6D'). *Unc5c* was largely absent from a narrow strip of cells close to and parallel with the ventricular zone. This strip coincided with the region that contained *Ntn1*-positive cells (compare Fig. 6D with A). *Plxna1*, which encodes a *Sema3a* receptor that mediates repulsion (Rohm et al., 2000; Takahashi et al., 1999; Tamagnone et al., 1999) was found to be distributed relatively homogeneously across the thalamus (Fig. 6E, Fig. S4D).

These expression patterns suggest that, whereas all thalamic axons might be repelled by *Sema3a* (owing to their expression of *Plxna1*), only some axons might be repelled by *Ntn1* (i.e. those originating laterally, which express *Unc5c*, and those *Unc5c*-expressing axons that originate medially) (Fig. 6K). This could explain why, in the grafting experiments described above, axons from lateral explants invariably navigated laterally, which would be away from medially located high levels of *Ntn1*. It could also explain why medial explants generated axons that were able to navigate on a broader front: some axons (those that express *Unc5c*)

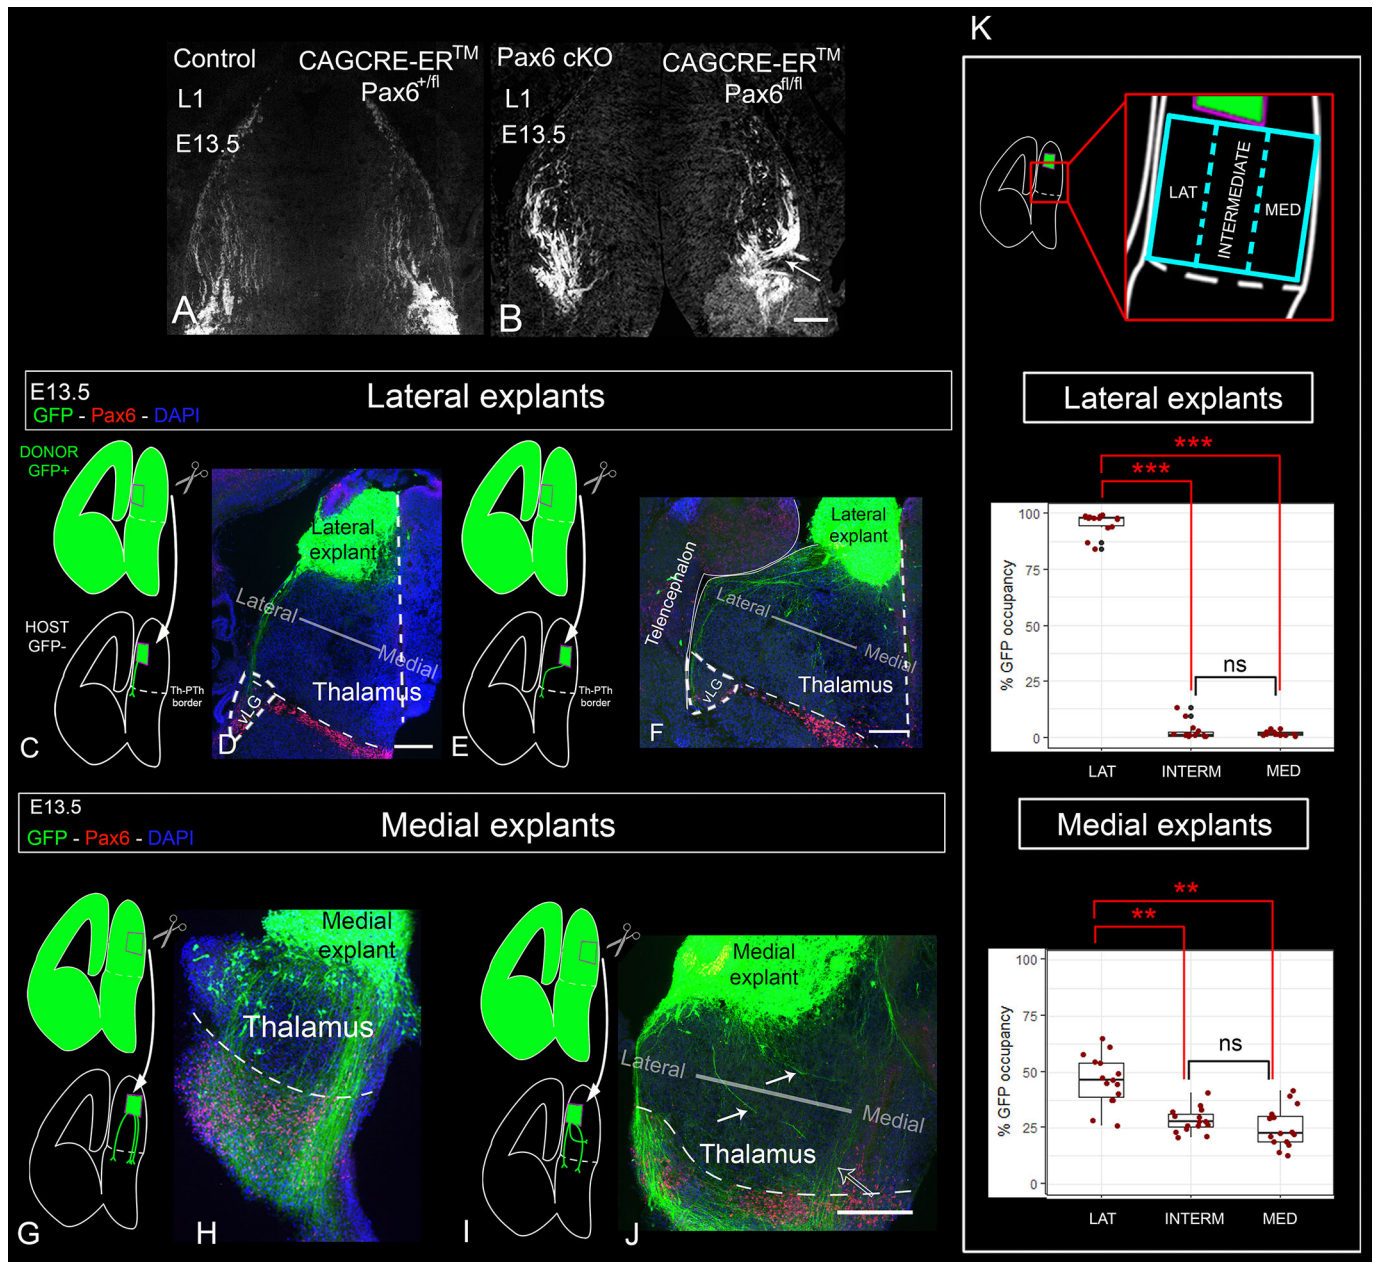

**Fig. 5. Subsets of thalamocortical axons show a preference for navigating through different parts of the thalamus.** (A,B) L1 staining shows that thalamocortical axons exhibit disorganized and erroneous trajectories in the thalamus of E13.5  $CAG^{CreER} Pax6$  cKOs. Arrow in B indicates one big bundle deviating from lateral to medial thalamus. (C–J) Schemes and images of the transplants using lateral (C–F) or medial (G–J) donor thalamus and grafted into lateral (C,D,G,H) or medial (E,F,I,J) host tissue. White arrows in J indicate medial axons turning from lateral to medial regions of the thalamus. (K) Quantification of the navigation of GFP-positive axons through three sectors of the thalamus shows that lateral axons have a strong preference for navigating through lateral thalamus, while medial axons show a more variable response. We quantified six thalamic graft experiments with embryos from three different litters (three using lateral explants and three using medial explants). Box plots show the percentage of GFP-positive axons detected on each sector of the thalamus. The ends of the whiskers represent the minimum and maximum values; the bottom of the box is the first quartile, the middle line is the median and the top of the box is the third quartile. Five rostrocaudal sections were quantified per explant. Each dot represents an area value of a single section. The nested factors litter:embryo were considered as biological replicates ( $n=3$ ).  $**P<1.0 \times 10^{-5}$ ,  $***P<1.0 \times 10^{-15}$ . Scale bars: 100  $\mu\text{m}$ . PTh, prethalamus; Th, thalamus; vLG, ventral lateral geniculate nucleus.

would be pushed relatively laterally by repulsion from medially expressed *Ntn1*; others (those that do not express *Unc5c*) would be able to maintain a medial trajectory through the *Ntn1*-expressing territory, thereby avoiding the high levels of *Sema3a* expressed in lateral thalamus (Fig. 6J). Other receptor-coding genes analysed (*Dcc*, *Unc5a* and *Unc5d*) showed little or no expression within the main body of the thalamus and are therefore unlikely to contribute to the navigation of thalamic axons within the thalamus (Fig. S4F,H,J).

We next asked whether the thalamic expression of *Ntn1* and *Sema3a*, and their receptors change in a way that might explain the medially directed deviation of lateral axons that we observed in the thalamus of  $CAG^{CreER} Pax6$  cKOs. In these embryos, we found that the medial domain of *Ntn1* expression was retained and appeared enlarged. *Sema3a* was still expressed higher laterally, although overall levels seemed reduced (Fig. 6F,G). These patterns are reconstructed in 3D in Fig. 6H. *Ntn1* and *Sema3a* expression in the



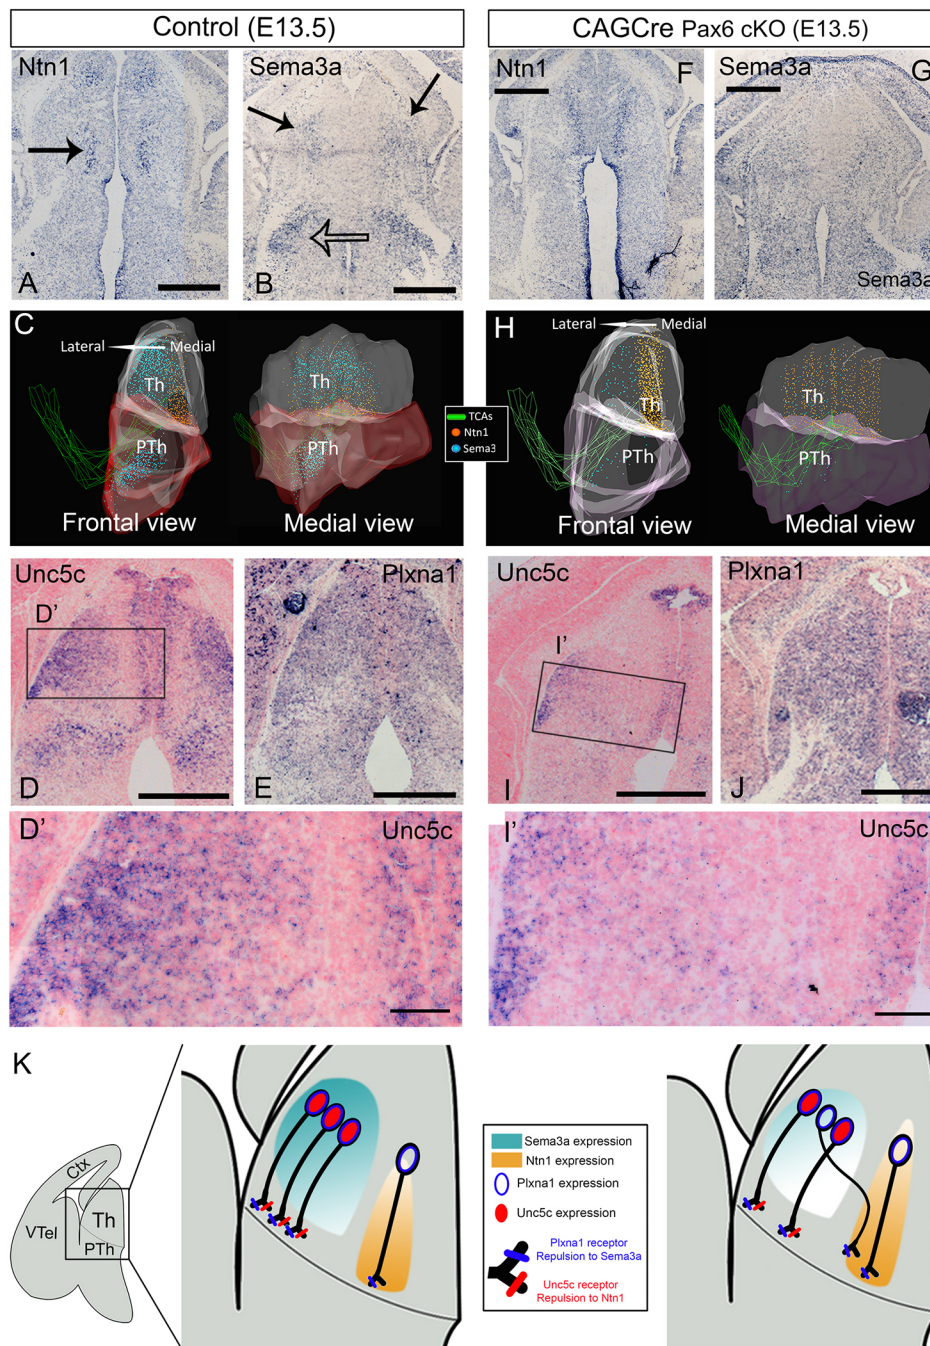

**Fig. 6. Axon guidance molecules and their receptors are altered in the diencephalon of *CAG<sup>CreER</sup> Pax6* cKOs.** (A–J) Expression pattern of *Ntn1* and *Sema3a* mRNA and their receptors *Unc5c* and *Plxn1* in the E13.5 diencephalon of controls (A–E) and *CAG<sup>CreER</sup> Pax6* cKOs (F–J). C and H show two views of 3D reconstructions of the *Ntn1* and *Sema3a* expression pattern from transverse *in situ* hybridization sections. (K) Schematics of the changes in *Ntn1* and *Sema3a* expression in the thalamus of controls (left) versus *CAG<sup>CreER</sup> Pax6* cKOs (right) and how we hypothesize this might affect the guidance of different subsets of thalamic axons. In controls (left), lateral thalamic neurons express *Unc5c* and *Plxn1*, being repelled by both guidance cues, which direct their axons out from the thalamus and towards the prethalamus in a straight trajectory. In *Pax6* cKOs (right), some lateral thalamic neurons lose their *Unc5c* expression but maintain their *Plxn1* expression, losing their repulsion to *Ntn1* but maintaining it for *Sema3a*, presumably making their axons deviate towards medial thalamic regions. Scale bars: 500  $\mu$ m in A, B, D, E–G, I, J; 100  $\mu$ m in D', I'. Ctx, cortex; PTh, prethalamus; Th, thalamus; VTel, ventral telencephalon. All described patterns were observed at least in three embryos belonging to three different litters for each genotype, unless otherwise stated.

subpallium of *CAG<sup>CreER</sup> Pax6* cKOs appeared to be unaffected (Fig. S4L–Q). The significance of changes in the expression levels of *Sema3a* and *Ntn1* in the thalamus of *CAG<sup>CreER</sup> Pax6* cKOs was confirmed by analysing a previously published RNAseq dataset (Fig. S4C, dataset from Quintana-Urzainqui et al., 2018).

Regarding the expression of guidance receptors, fewer laterally located neurons expressed *Unc5c* in *CAG<sup>CreER</sup> Pax6* cKOs than in controls (compare Fig. 6I' and D'). Significant numbers of *Unc5c*-negative neurons were now intermingled with *Unc5c*-positive neurons even in the most lateral thalamic tissue (Fig. 6I'). The thalamic expression pattern of *Plxn1* did not change in the absence of *Pax6* (Fig. 6J, Fig. S4E), nor did that of any of the other receptor-coding genes studied (Fig. S4F–K).

As reported above, we discovered that *CAG<sup>CreER</sup> Pax6* cKOs show a misrouting in a medial direction of axons from the lateral

thalamus (Fig. 1), and our finding that many laterally located thalamic neurons lose their expression of *Unc5c* in these mutants, provides a likely explanation, summarized in Fig. 6K. We propose that *Unc5c*-negative laterally located thalamic neurons in *CAG<sup>CreER</sup> Pax6* cKO thalamus would no longer be repelled from the medial thalamus by its high levels of *Ntn1*. Consequently, they would be more likely to stray, or perhaps to be pushed by relatively high lateral levels of *Sema3a*, towards a medial direction (Fig. 6K, right side).

#### Subsets of *Pax6*-deficient lateral thalamic axons deviate medially when confronted with control thalamus

Finally, we grafted GFP-positive lateral thalamic explants from *CAG<sup>CreER</sup> Pax6* cKO embryos into the lateral thalamus of GFP-negative slices from littermate control embryos, following the same experimental paradigm as before (Fig. 7A, see Fig. 5, and Materials

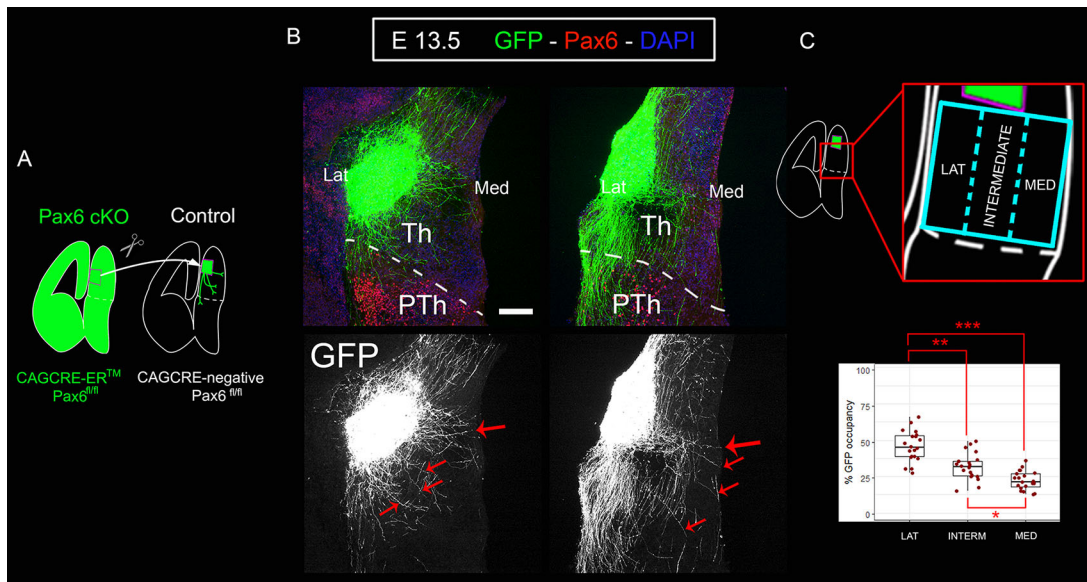

**Fig. 7. Subsets of lateral thalamocortical axons from CAG<sup>CreER</sup> Pax6 cKOs deviate medially when confronted with control thalamus.** (A) Schematic of the slice culture transplant experiment in which lateral thalamus from GFP-positive Pax6 cKOs embryos (CAG<sup>CreER</sup><sup>+</sup>; Pax6<sup>fl/fl</sup>) was grafted into lateral thalamus of control GFP-negative littermates (CAG<sup>CreER</sup><sup>-</sup>; Pax6<sup>fl/fl</sup>). (B) Subsets of axons from Pax6 cKO lateral thalamus deviate from their normal trajectory towards medial thalamic regions (red arrows). Eleven embryos from four different litters were used. A total of 22 (bilateral) graft experiments were performed. We observed medially deviated axons in all cases. (C) Quantification (four grafts from embryos from four different litters) showed that Pax6-deficient lateral thalamic axons navigate across three delimited sectors, unlike their control counterparts, which showed a strong preference for the lateral sector (Fig. 5K). Box plots show the percentage of GFP-positive axons detected on each sector of the thalamus. The ends of the whiskers represent the minimum and maximum values; the bottom of the box is the first quartile, the middle line is the median and the top of the box is the third quartile. Five rostrocaudal sections were quantified per explant. Each dot represents an area value of a single section. The nested factors litter:embryo were considered as biological replicates ( $n=4$ ). \* $P<0.001$ , \*\* $P<1.0 \times 10^{-5}$ , \*\*\* $P<1.0 \times 10^{-15}$ . Scale bar: 100  $\mu\text{m}$ . Lat, lateral aspect of diencephalon; Med, medial aspect of diencephalon; Th, thalamus; PTh, prethalamus.

and Methods). Our model would predict that subsets of Pax6-deficient lateral thalamic axons, presumably those that have lost their repulsion to *Ntn1*, would deviate towards medial areas when confronted with control thalamus. We used 11 embryos from four different litters and performed a total of 22 (bilateral) graft experiments. In all cases, we observed subsets of GFP-positive axons deviating medially (Fig. 7B, red arrows). To measure the navigation pattern of these axons, we divided the thalamus in three equal medial-lateral sectors and quantified the percentage of GFP on each of them (Fig. 7C). For this analysis, we used four explants from four different litters (five slices per explant). We found that axons spread throughout the three areas of the thalamus (45.8% laterally, 31.8% intermedially and 22.44% medially; Fig. 7C). This is in striking contrast to the almost invariably (95.7%) lateral trajectories of axons from control lateral thalamic explants grafted into control thalamic tissue (Fig. 5C-F,K). This evidence supports our model and the idea that thalamic neurons hold intrinsic information that determines the medial-lateral position of their axons when crossing the thalamus. Overall, our findings indicate that mechanisms exist within the thalamus itself to ensure that its TCAs exit in an orderly manner and that these mechanisms may play an important part in the correct topographic mapping of TCAs onto the cortex.

## DISCUSSION

During embryonic development, thalamic axons undertake a long journey, navigating through several tissues before they arrive at the cortex. It is therefore crucial that their guidance is tightly regulated by mechanisms placed along the route. Previous studies have demonstrated the importance of the ventral telencephalon as an intermediate target for establishing correct topographical thalamocortical connections. Here, gradients of signalling molecules sort different subsets of TCAs towards different areas of

the embryonic cortex (Antón-Bolaños et al., 2018; Bielle et al., 2011; Braisted et al., 1999; Dufour et al., 2003; Métin and Godement, 1996; Molnár et al., 2012; Vanderhaeghen and Polleux, 2004). The importance of other tissues along the route in the establishment and/or maintenance of axonal topography remained unexplored. We now show that if thalamic axons do not emerge in order from the thalamus they will connect with the wrong areas of the cortex, resulting in topographical defects. This highlights the importance of maintaining axonal order throughout the route and suggests the existence of guidance mechanisms within the diencephalon to guarantee that this happens.

Our *in vitro* graft experiments demonstrated that embryonic thalamic tissue is instructive for TCAs and sorts axons according to their original medio-lateral position. We went on to find a possible guidance mechanism acting within the thalamus. The thalamus expresses *Ntn1* and *Sema3a*, some of the same guidance molecules known to guide TCAs in the ventral telencephalon (Bielle et al., 2011; Powell et al., 2008; Wright et al., 2007). What is more, there is an interesting correspondence between the regions expressing each of those molecules in the thalamus and in the ventral telencephalon. TCAs that emerge and navigate through the *Sema3a*-high region of the thalamus (lateral-caudal thalamus, dLGN) are steered towards the *Sema3a*-high region in the ventral telencephalon, while axons that emerge and navigate through the *Ntn1*-high region of the thalamus (ventral-medial thalamus, MP) are sorted towards *Ntn1*-high regions in the ventral telencephalon. This suggests that each subset of thalamic axons maintains the expression of the same combination of axon guidance receptors along the route and therefore shows the same chemotactic response when confronting gradients of signalling cues. Likewise, it indicates that the same gradients of guidance molecules are re-used at different levels of the thalamocortical pathway to maintain topographic order.

The chemotactic behaviour of TCAs with respect to *Sema3a* and *Ntn1* gradients in the thalamus and ventral telencephalon can be explained by our observations of the expression of *Sema3a* and *Ntn1* receptors in developing thalamus. We show that all thalamic neurons seem to express homogeneous levels of *Plxna1*, a receptor mediating repulsion to *Sema3a* (Rohm et al., 2000; Takahashi et al., 1999; Tamagnone et al., 1999), while *Unc5c*, a receptor mediating repulsion to *Ntn1* (Leonardo et al., 1997), was found to be expressed in a lateral-high medial-low gradient. According to these observations, we propose a model in which complementary expression patterns of *Sema3a* and *Ntn1* can establish topographical order on TCAs by a mechanism of double repulsion, in which all thalamic axons have the potential to be repelled by *Sema3a* but only lateral axons are additionally repelled by *Ntn1*. It is possible that laterally derived axons experience stronger *Ntn1* repulsion the more lateral they are. Thus, lateral thalamic axons prefer to navigate through *Sema3a*-high, *Ntn1*-low regions because they might be more strongly repelled by *Ntn1* than by *Sema3a*. Axons located in intermediate regions of the thalamus express lower levels of *Unc5c*; thus, they might be equally repelled by *Sema3a* and *Ntn1*, and chose to navigate across regions with moderate levels of both signalling cues. Likewise, medial axons are only repelled by *Sema3a* and are neutral to *Ntn1*: therefore they chose to navigate through *Sema3a*-low, *Ntn1*-high areas.

Supporting this model are the experiments showing that TCAs are repelled by *Ntn1* (Bielle et al., 2011; Bonnin et al., 2007; Powell et al., 2008) and thalamic growth cones show retraction in the presence of *Sema3a* (Bagnard et al., 2001). Moreover, Wright and colleagues reported that, in mice harbouring a mutation that makes the axons non-responsive to *Sema3a*, axons from the ventrobasal (VB) thalamic nucleus were caudally shifted and target the visual cortex instead of the somatosensory cortex (Wright et al., 2007). Our double repulsion model satisfactorily explains this phenotype. The VB nucleus is located in an intermediate thalamic region that would contain a substantial number of *Unc5c*-positive neurons. In those mutants, VB axons lose their repulsion to *Sema3a* but many would still be repelled by *Ntn1*, and therefore would steer towards *Sema3a*-high, *Ntn1*-low regions both in the thalamus and the ventral telencephalon. The behaviour of thalamic axons in our explant experiments using donor tissue from controls and *CAG<sup>CreER</sup> Pax6* cKOs, also support the model.

Other molecules known to form gradients and guide TCAs in the ventral telencephalon, such as *Slit1* or ephrin A5 (Bielle et al., 2011; Dufour et al., 2003; Molnár et al., 2012; Seibt et al., 2003; Vanderhaeghen and Polleux, 2004), were not analysed in this study. It remains to be tested whether these molecules and their receptors are expressed in the thalamus in a gradient fashion and whether they follow the same rules proposed in our model.

It is important to highlight that, in this study, we considered only the medio-lateral axis of the main thalamic body, but the same or other guidance cues and receptors probably function in other directions. For example, work in mice showed that *Unc5c* (Bonnin et al., 2007) and *DCC* (Powell et al., 2008) are also highly expressed in the rostral thalamus, at a level we did not cover in our expression and tracer analyses.

Another important question is how *Pax6* inactivation leads to deficits in thalamic organization, as *Pax6* is only expressed in progenitors. We show here and in a previous paper that thalamic patterning does not seem to be largely affected in *CAG<sup>CreER</sup> Pax6* cKOs (Fig. S1 and Quintana-Urzaínqui et al., 2018) and that the main changes in gene expression in postmitotic neurons are related to axon guidance molecules. One possibility is that *Pax6* expression in thalamic progenitors affects transcriptional programmes and

indirectly translates into actions on the postmitotic expression of specific axon guidance molecules.

Finally, our results have given interesting new insights into the development and the importance of the pioneer axons from the prethalamus to the thalamus. First, we found that the prethalamic neurons extending pioneer axons to the thalamus belong to a particular lineage: the *Gsx2*-lineage and not the *Zic4*-lineage. Second, although disturbing the prethalamus-to-thalamus pioneers did not stop TCAs reaching the cortex without any topographic error, it did cause them to fasciculate prematurely as they crossed the prethalamus. Growing axons often increase their fasciculation when they cross regions that are hostile to their growth. Ours and other studies have shown that the prethalamus also expresses guidance cues with potential to exert a repulsive response of TCAs (Ono et al., 2014); thus, it is possible that interactions between the developing TCAs and prethalamic pioneers somehow helps the passage of the TCAs across this region. Further work is needed to discover what the consequences are if this help is unavailable.

## MATERIALS AND METHODS

### Mice

All animals (*Mus musculus*) were bred according to the guidelines of the UK Animals (Scientific Procedures) Act 1986 and all procedures were approved by Edinburgh University's Animal Ethics Committee. For conditional inactivation of *Pax6*, we used a tamoxifen-inducible *Pax6<sup>loxP</sup>* allele (Simpson et al., 2009) and a RCE:LoxP EGFP Cre reporter allele (Sousa et al., 2009), and we combined them with different Cre lines. To generate a deletion of *Pax6* throughout the embryo, we used lines carrying a *CAGGCre-ER<sup>TM</sup>* allele (Hayashi and McMahon, 2002; Quintana-Urzaínqui et al., 2018). As controls, we used both wild-type and *CAG<sup>CreER</sup> Pax6<sup>fl/+</sup>* littermate embryos as the latter express normal levels of *Pax6* protein, almost certainly because of a feedback loop that compensates for a deletion in one allele by increasing the activity of the other (Caballero et al., 2014; Manuel et al., 2015).

To inactivate *Pax6* in different parts of the prethalamus we used either a *Gsx2-Cre* (Kessarar et al., 2006) or the *Zic4-Cre* allele (Rubin et al., 2011). For cortex-specific deletion of *Pax6*, we used *Emx1Cre-ER<sup>TM</sup>* (Kessarar et al., 2006). The DTy54 YAC reporter allele (Tyas et al., 2006) was combined with the *Gsx2-Cre* allele to generate *Gsx2Cre*; *Pax6<sup>loxP/loxP</sup>* embryos expressing tauGFP in cells in which the *Pax6* gene is active.

Embryos heterozygous for the *Pax6<sup>loxP</sup>* allele (*Pax6<sup>fl/+</sup>*) were used as controls because previous studies have shown no detectable defects in the forebrain of *Pax6<sup>fl/+</sup>* embryos (Simpson et al., 2009). Embryos carrying two copies of the floxed *Pax6* allele (*Pax6<sup>fl/fl</sup>*) were the experimental conditional knockout (cKO) groups.

For thalamic explant experiments, we generated litters containing GFP-positive and -negative embryos by crossing a line of studs heterozygous for a constitutively active form of the *CAGGCre-ER<sup>TM</sup>* allele and the RCE:LoxP EGFP Cre reporter allele with wild-type females. In the second set of explant experiments, we performed crossings to generate litters containing GFP-positive *Pax6* cKO embryos (*CAGGCre<sup>ER</sup> TM*; *Pax6<sup>fl/fl</sup>*), and GFP-negative control embryos (homozygous for the *Pax6* floxed allele but not expressing the CRE allele). Both embryos carried a RCE:LoxP EGFP allele reporting Cre activity and allowing us to select the embryos within the same litter and visualizing *Pax6* cKO axons in the explants. Embryos used in the two sets of explant experiments had the same mixed genetic background (CD1, CBA and C67BL/6).

The day the vaginal plug was detected was considered E0.5. Pregnant mice were given 10 mg of tamoxifen (Sigma) by oral gavage on embryonic day 9.5 (E9.5) and embryos were collected on E12.5, E13.5, E14.5, E15.5, E16.5 or E18.5. For the DiI and DiA tracing experiments, wild-type embryos (CD1 background) were additionally used as controls.

### Immunohistochemistry

Embryos were decapitated and fixed in 4% paraformaldehyde (PFA) in phosphate-buffered saline (PBS) overnight at 4°C. After washes in PBS,

heads were cryoprotected by immersion in 30% sucrose in PBS, embedded in OCT compound and sectioned using a cryostat at 10  $\mu$ m.

Cryosections were left to stabilize at room temperature for at least 2 h and then washed three times in PBST (1 $\times$  PBS with 0.1% Triton X-100; Sigma). To block endogenous peroxidase, sections were treated with 3% H<sub>2</sub>O<sub>2</sub> for 10 min. After PBS washes, antigen retrieval was performed by immersing the sections in sodium citrate buffer (10 mM, pH 6) heated at ~90°C using a microwave for 20 min. Sections were then incubated with the rabbit polyclonal anti-Pax6 antibody (1:200, BioLegend, 901302) overnight at 4°C. The secondary antibody (goat anti-rabbit biotinylated, 1:200, Vector Laboratories, BA-1000) was incubated for 1 h at room temperature followed by a 30 min incubation with Avidin-Biotin complex (ABC kit, Vector Laboratories, PK6100). Finally, a diaminobenzidine (DAB, Vector Laboratories, SK4100) reaction was used to obtain a brown precipitate and sections were mounted in DPX media (Sigma-Aldrich, 06522).

For immunofluorescence, cryosections were incubated overnight at 4°C with the following primary antibodies: rat monoclonal anti-neural cell adhesion molecule L1 (1:500 Millipore, MAB5272, clone 324, RRID: AB\_2133200), rabbit polyclonal anti-Pax6 (1:200, BioLegend, 901302; RRID:AB\_2565003), goat polyclonal anti-GFP (1:200, Abcam, ab6673, RRID:AB\_305643), rabbit polyclonal anti-GFP (1:200, Abcam, ab290, RRID:AB\_303395). The following secondary antibodies from Thermo Fisher Scientific were incubated at room temperature for 1 h: donkey anti-rat Alexa<sup>488</sup> (1:100, Thermo Fisher Scientific, A21208), donkey anti-rat Alexa<sup>594</sup> (1:100, Thermo Fisher Scientific, A-21209), donkey anti-rabbit Alexa<sup>568</sup> (1:100, Thermo Fisher, A10042), donkey anti-rabbit Alexa<sup>488</sup> (1:100, Thermo Fisher Scientific, R37118) and donkey anti-goat Alexa<sup>488</sup> (1:100, Invitrogen, A11055). Sections were counterstained with DAPI (Thermo Fisher Scientific, D1306) and mounted in ProLong Gold Antifade Mountant (Thermo Fisher Scientific, P36930).

### **In situ hybridization**

*In vitro* transcription of digoxigenin-labelled probes was carried out using DIG RNA-labelling kit (Sigma-Aldrich, 11175025910). The following digoxigenin-labelled probes were synthesized in the lab from cDNA: Ntn1 (kindly donated by Dr Thomas Theil, (University of Edinburgh, UK); forward primer, CTCCTCACCGACCTCAATAAC; reverse primer, GCG-ATTTAGGTGACATATAGTTGTGCCTACAGTCACACACC), *Sema3a* (forward primer, ACTGCTGACTTGGAGGAC; reverse primer, ACA-AACACGAGTGCTGGTAG); *Plxn1* (forward primer, GACGAGATTC-TGGTGGCTCT; reverse primer, CATGGCAGGGAGAGGAAGG), *DCC* (forward primer, AACAGAAGGTCAAGCACGTG; reverse primer, CA-ATCACCGACCAACACA), *Unc5a* (forward primer, CTGTCAGACC-CTGCTGAGT; reverse primer, GGGCTAGAGTTCCGACATC), *Unc5d* (forward primer, GGACAGAGCTGAGGACAAC; reverse primer, GT-ATCAAACGTGGCGCAGAT). *Unc5c* probe was kindly donated by Dr Vassiliki Fotaki (University of Edinburgh, UK) and Dr Suran Ackerman (UC San Diego, USA). Cryosections were processed for *in situ* hybridization using standard protocols. Some slides were counterstained using nuclear Fast Red (Vector Laboratories, LS-J1044-500).

### **Axon tract tracing**

For cortical injections, brains were dissected between E15.5 and E18.5, and fixed in 4% PFA in PBS at 4°C for at least 48 h. After washes in PBS, filter paper impregnated with DiI (NeuroVue Red, Molecular Targeting Technologies, FS-1002) and DiA (NeuroVue Jade, Molecular Targeting Technologies, FS-1006) was inserted approximately in the somatosensory and visual areas of the cortex, respectively. Brains were incubated at 37°C in PBS for 4 weeks to allow the diffusion of the tracers.

For thalamic injections in fixed tissue, embryos were dissected at E13.5 and fixed overnight in 4% PFA in PBS at 4°C. After PBS washes, brains were cut in half at the midline and DiI was inserted in the thalamus using a fine probe. Brains were incubated for 1 week in PBS at 37°C.

Brains were then cryoprotected in 30% sucrose, embedded in OCT compound and sectioned using a cryostat at 30  $\mu$ m. Sections were counterstained with DAPI diluted 1:1000 in distilled water.

For thalamic injections in non-fixed tissue, we applied neurobiotin (Vector Laboratories, SP-1120), and an amino derivative of biotin was used

as an intracellular label for neurons. The tracer in powder was held at the tip of an entomological needle (00) and recrystallized using vapour from distilled water. Brains were cut in half and the crystal was inserted in the thalamus. Brains were then immersed in continuously oxygenated Ringer's solution (124 mM NaCl, 5 mM KCl, 1.2 mM KH<sub>2</sub>PO<sub>4</sub>, 1.3 mM MgSO<sub>4</sub> 7H<sub>2</sub>O, 26 mM NaHCO<sub>3</sub>, 2.4 mM CaCl<sub>2</sub> 2H<sub>2</sub>O, 10 mM glucose) and incubated overnight at room temperature. The tissue was fixed in 4% PFA in PBS overnight at 4°C, washed in PBS, cryoprotected in 30% sucrose and sectioned using a cryostat at 10  $\mu$ m. Neurobiotin was visualized by incubating the sections with either Strep<sup>488</sup> or Strep<sup>546</sup>.

### **Thalamic explants and slice culture**

E13.5 embryos were dissected, embedded in 4% low melting temperature agarose (Lonza, 50100) and sectioned using a vibratome to produce 300  $\mu$ m coronal slices. Lateral or medial thalamic explants were dissected from slices belonging to GFP-positive thalamus and transplanted into equivalent rostral/caudal slices belonging to GFP-negative embryos (see schemas in Fig. 5). The thalamus and its different medio-lateral regions were recognized under the dissecting scope by anatomical landmarks. Slices were then cultured for 72 h in floating membranes (Whatman nuclepore track-etched membranes, WHA110414) over serum-free Neurobasal medium (Thermo Fisher Scientific, 21103049) in 60 mm centre well organ culture dishes (Falcon, 353037). Cultures were fixed in 4% PFA overnight at 4°C, cryoprotected in 30% sucrose and cryosectioned at 10  $\mu$ m to be processed for immunofluorescence. All grafts were positioned in direct contact with presectioned host tissue to avoid pial growth.

We performed a total of 31 transplant experiments. In the first set of experiments, we grafted control thalamus into control tissue. We used embryos from four different litters for a total of nine different transplants (four using lateral thalamus and five using medial thalamus as donor tissue). In the second set of experiments, we grafted Pax6 cKO lateral thalamus into control thalamus, using 11 embryos from four different litters and a total of 22 individual (bilateral) transplants.

### **Image analysis and quantification of thalamic area occupied by DiI and DiA**

Images of transverse sections were analysed blind using Fiji software (Schindelin et al., 2012) for seven E15.5 embryos belonging to three different litters (four controls and three *CAG<sup>CreER</sup> Pax6* cKOs). For each embryo, we analysed at least five sections at different rostral-caudal levels. For each section, we isolated the DAPI channel and defined the dLGN and VP nucleus as regions of interest (ROIs) blind to the other channels (DiI and DiA). We next measured the area occupied by DiI and DiA within each ROI, defining a positive label using the automated thresholding function in Fiji software set for 'MaxEntropy'. Data from all sections and genotypes was statistically assessed to test the effects of Pax6 inactivation on the area occupied by each dye on each nucleus. Data were fitted to a mixed linear model using the *lmer()* function from *lme4* R package (Bates et al., 2015). 'DiI in dLGN', 'DiI in VP', 'DiA in dLGN' and 'DiA in VP' were set as dependant variables, with 'genotype' as a fixed effect and 'litter:embryo' factors as nested random effects. Therefore, each litter was considered a biological replicate ( $n=3$ ). *P*-values of fixed effects were obtained using the *Anova()* function from *car* package (Fox and Weisberg, 2019).

### **Quantification of thalamic explant experiments**

Images of transverse sections of our explants were analysed using Fiji software (Schindelin et al., 2012). We quantified a total of ten culture thalamic explants (three from lateral control donor tissue, three from medial control donor tissue and four from lateral Pax6 cKO tissue) from seven different litters, using five slices per explant corresponding to different rostral-caudal levels of the explants. For each section we first divided the thalamus into three equal medial-lateral sectors (defined as ROIs, see Fig. 5), avoiding the area occupied by the explant itself. We then isolated the GFP channel and measured the area occupied by GFP-positive elements within each ROI, defining positive label using the automated thresholding function in Fiji software set for 'MaxEntropy'. To test for the differences of GFP occupancy in the three different areas (lateral, intermedial and medial),

the data were fitted to a mixed linear model using the `lmer()` function from `lme4` R package (Bates et al., 2015). For each experimental group (lateral control explants, medial control explants and lateral Pax6 cKO explants), GFP occupancy in ‘lateral’, ‘intermedial’ and ‘medial’ thalamic sectors were set as dependant variables, with ‘genotype’ as a fixed effect and ‘litter: embryo’ factors as nested random effects. Therefore, each litter was considered a biological replicate ( $n=3$  for lateral and medial control explants, and  $n=4$  for lateral Pax6 cKO explants).  $P$ -values of the linear hypotheses on fixed effects were obtained using the `Anova()` function from `car` package (Fox and Weisberg, 2019).

For the DiI and thalamic explant quantifications, data were presented as box plots representing the median value and the distribution of the quartiles. Individual datapoints representing measurements of each slice were plotted overlying the box plots.

### Quantifications of numbers of axons and bundle width

Images were analysed blind for at least three E13.5 embryos for each condition belonging to three different litters. We positioned three lines across the prethalamus: (1) at the thalamic-prethalamic border (Th-PTh), guided by prethalamic expression of Pax6; (2) at a lower prethalamic position (low-PTh), guided by the end of Pax6 prethalamic expression; and (3) at the midpoint position between the two other lines (mid-PTh). We generated a L1 intensity profile using Fiji software (Schindelin et al., 2012). Intensity profiles were then processed by tracing a line at an arbitrary (but constant for all quantifications) intensity level and quantifying the number and width of bundles crossing the line. Statistical significance was assessed applying two-tailed unpaired Student’s  $t$ -test and  $n=3$ .

### 3D reconstruction

We used Free-D software (Andrey and Maurin, 2005) to reconstruct the structure of thalamus and prethalamus from transverse slices stained with DAPI and using antibodies against L1 and Pax6 to reveal the thalamocortical tract and the limits of the diencephalic structures, respectively. The thalamus territory was recognisable by an intense DAPI staining and Pax6-negative mantle zone, contrasting with prethalamus and pretectum, which express high levels of Pax6 in the postmitotic neurons. The location of the signalling molecules was included in the model by comparison of transversal and sagittal sections stained for Ntn1 and Sema3a and their adjacent sections processed for Pax6 and L1 with the sections used to build the model scaffold. Dots are representative of staining density. We used sagittal and transverse sections from four embryos from three different litters.

### Microscopy and imaging

*In situ* hybridization and immunohistochemical images were taken with a Leica DMNB microscope coupled to a Leica DFC480 camera. Fluorescence images were taken using a Leica DM5500B automated epifluorescence microscope connected to a DFC360FX camera. Image panels were created using Adobe Photoshop CS6.

### Acknowledgements

We thank Dr Martine Manuel for her invaluable help with the generation of mice lines for the explant experiments and Dr Vassiliki Fotaki for providing the *Unc5c* probe.

### Competing interests

The authors declare no competing or financial interests.

### Author contributions

Conceptualization: I.Q.-U., P.H.-M., D.J.P.; Methodology: I.Q.-U., P.H.-M., J.M.C., Z.K.; Validation: P.H.-M., Z.L.; Formal analysis: I.Q.-U., P.H.-M., J.M.C., Z.L., Z.K.; Investigation: P.H.-M., J.M.C., Z.L.; Writing - original draft: I.Q.-U.; Writing - review & editing: I.Q.-U., D.J.P.; Supervision: I.Q.-U., D.J.P.; Funding acquisition: I.Q.-U., D.J.P.

### Funding

This work was supported by a Marie Curie Fellowship from the European Commission [624441]; by a Medical Research Council UK Research Grant [N012291]; and a Biotechnology and Biological Sciences Research Council UK Research Grant [N006542]. Open access funding provided by the University of Edinburgh. Deposited in PMC for immediate release.

### Supplementary information

Supplementary information available online at <https://dev.biologists.org/lookup/doi/10.1242/dev.184523.supplemental>

### Peer review history

The peer review history is available online at <https://dev.biologists.org/lookup/doi/10.1242/dev.184523.reviewer-comments.pdf>

### References

- Amassian, V. and Weiner, H. (1966). Monosynaptic and polysynaptic activation of pyramidal tract neurons by thalamic stimulation. In *The Thalamus* (ed. D. P. Purpura and M. D. Yahr), pp. 255-282. New York: Columbia University Press.
- Andrey, P. and Maurin, Y. (2005). Free-D: an integrated environment for three-dimensional reconstruction from serial sections. *J. Neurosci. Methods* **145**, 233-244. doi:10.1016/j.jneumeth.2005.01.006
- Angevine, J. B., Jr (1970). Time of neuron origin in the diencephalon of the mouse. An autoradiographic study. *J. Comp. Neurol.* **139**, 129-187. doi:10.1002/cne.901390202
- Antón-Bolaños, N., Espinosa, A. and López-Bendito, G. (2018). Developmental interactions between thalamus and cortex: a true love reciprocal story. *Curr. Opin. Neurobiol.* **52**, 33-41. doi:10.1016/j.conb.2018.04.018
- Auladell, C., Pérez-Sust, P., Supér, H. and Soriano, E. (2000). The early development of thalamocortical and corticothalamic projections in the mouse. *Anat. Embryol.* **201**, 169-179. doi:10.1007/PL00008238
- Bagnard, D., Chouinamountri, N., Püschel, A. W. and Bolz, J. (2001). Axonal surface molecules act in combination with Semaphorin 3A during the establishment of corticothalamic projections. *Cereb. Cortex* **11**, 278-285. doi:10.1093/cercor/11.3.278
- Bates, D., Mächler, M., Bolker, B. and Walker, S. (2015). Fitting linear mixed-effects models using `lme4`. *J. Stat. Softw.* **67**, 1-48. doi:10.18637/jss.v067.i01
- Bielle, F., Marcos-Mondéjar, P., Leyva-Díaz, E., Lokmane, L., Mire, E., Mailhes, C., Keita, M., García, N., Tessier-Lavigne, M., Garel, S. et al. (2011). Emergent growth cone responses to combinations of Slit1 and Netrin 1 in thalamocortical axon topography. *Curr. Biol.* **21**, 1748-1755. doi:10.1016/j.cub.2011.09.008
- Bonnin, A., Torii, M., Wang, L., Rakic, P. and Levitt, P. (2007). Serotonin modulates the response of embryonic thalamocortical axons to netrin-1. *Nat. Neurosci.* **10**, 588-597. doi:10.1038/nn1896
- Bosch-Bouju, C., Hyland, B. I. and Parr-Brownlie, L. C. (2013). Motor thalamus integration of cortical, cerebellar and basal ganglia information: implications for normal and parkinsonian conditions. *Front. Comput. Neurosci.* **7**, 1-21. doi:10.3389/fncom.2013.00163
- Braisted, J. E., Tuttle, R. and O’Leary, D. D. M. (1999). Thalamocortical axons are influenced by chemorepellent and chemoattractant activities localized to decision points along their path. *Dev. Biol.* **208**, 430-440. doi:10.1006/dbio.1999.9216
- Caballero, I. M., Manuel, M. N., Molinek, M., Quintana-Urzainqui, I., Mi, D., Shimogori, T. and Price, D. J. (2014). Cell-autonomous repression of *Shh* by transcription factor Pax6 regulates diencephalic patterning by controlling the central diencephalic organizer. *Cell Rep.* **8**, 1405-1418. doi:10.1016/j.celrep.2014.07.051
- Clegg, J. M., Li, Z., Molinek, M., Caballero, I. M., Manuel, M. N. and Price, D. J. (2015). Pax6 is required intrinsically by thalamic progenitors for the normal molecular patterning of thalamic neurons but not the growth and guidance of their axons. *Neural Dev.* **10**, 26. doi:10.1186/s13064-015-0053-7
- Dufour, A., Seibt, J., Passante, L., Depaepe, V., Ciossek, T., Frisén, J., Kullander, K., Flanagan, J. G., Polleux, F. and Vanderhaeghen, P. (2003). Area specificity and topography of thalamocortical projections are controlled by ephrin/Eph genes. *Neuron* **39**, 453-465. doi:10.1016/S0896-6273(03)00440-9
- Fox, J. and Weisberg, S. (2019). *An R Companion to Applied Regression*, 3rd edn. Thousand Oaks, CA: Sage.
- Fukuda, T., Kawano, H., Ohyama, K., Li, H.-P., Takeda, Y., Oohira, A. and Kawamura, K. (1997). Immunohistochemical localization of Neurocan and L1 in the Formation of Thalamocortical Pathway of developing rats. *J. Comp. Neurol.* **382**, 141-152. doi:10.1002/(SICI)1096-9861(19970602)382:2<141::AID-CNE1>3.0.CO;2-3
- Gaston-massuet, C., Henderson, D. J., Greene, N. D. E. and Copp, A. J. (2005). *Zic4*, a Zinc-finger transcription factor, is expressed in the developing mouse nervous system. *Dev. Dyn.* **233**, 1110-1115. doi:10.1002/dvdy.20417
- Georgala, P. A., Carr, C. B. and Price, D. J. (2011). The role of Pax6 in forebrain development. *Dev. Neurobiol.* **71**, 690-709. doi:10.1002/dneu.20895
- Hayashi, S. and McMahon, A. P. (2002). Efficient recombination in diverse tissues by a tamoxifen-inducible form of Cre: a tool for temporally regulated gene activation/inactivation in the mouse. *Dev. Biol.* **244**, 305-318. doi:10.1006/dbio.2002.0597
- Jones, E. G. (2007). *The Thalamus*, 2nd edn. Cambridge: Cambridge University Press.
- Jones, L., López-bendito, G., Gruss, P., Stoykova, A. and Molnár, Z. (2002). Pax6 is required for the normal development of the forebrain axonal connections. *Development* **129**, 5041-5052.

- Kessarlis, N., Fogarty, M., Iannarelli, P., Grist, M., Wegner, M. and Richardson, W. D.** (2006). Competing waves of oligodendrocytes in the forebrain and postnatal elimination of an embryonic lineage. *Nat. Neurosci.* **9**, 173-179. doi:10.1038/nrn1620
- Leonardo, E. D., Hinck, L., Masu, M., Keino-Masu, K., Ackerman, S. L. and Tessier-Lavigne, M.** (1997). Vertebrate homologues of *C. elegans* UNC-5 are candidate netrin receptors. *Nature* **386**, 833-838. doi:10.1038/386833a0
- Li, Z., Pratt, T. and Price, D. J.** (2018). *Zic4*-lineage cells increase their contribution to visual thalamic nuclei during murine embryogenesis if they are homozygous or heterozygous for loss of *Pax6* function. *eNeuro* **5**, 1-19. doi:10.1523/ENEURO.0367-18.2018
- López-Bendito, G. and Molnár, Z.** (2003). Thalamocortical development: how are we going to get there? *Nat. Rev. Neurosci.* **4**, 276-289. doi:10.1038/nrn1075
- López-Bendito, G., Cautinat, A., Sánchez, J. A., Bielle, F., Flames, N., Garratt, A. N., Talmage, D. A., Role, L. W., Charnay, P., Marín, O. et al.** (2006). Tangential neuronal migration controls axon guidance: a role for neuregulin-1 in thalamocortical axon navigation. *Cell* **125**, 127-142. doi:10.1016/j.cell.2006.01.042
- Manuel, M. N., Mi, D., Mason, J. O. and Price, D. J.** (2015). Regulation of cerebral cortical neurogenesis by the *Pax6* transcription factor. *Front. Cell. Neurosci.* **9**, 1-21. doi:10.3389/fncel.2015.00070
- Métin, C. and Godement, P.** (1996). The ganglionic eminence may be an intermediate target for corticofugal and thalamocortical axons. *J. Neurosci.* **16**, 3219-3235. doi:10.1523/JNEUROSCI.16-10-03219.1996
- Mi, D., Carr, C. B., Georgala, P. A., Huang, Y.-T., Manuel, M. N., Jeanes, E., Niisato, E., Sansom, S. N., Livesey, F. J., Theil, T. et al.** (2013). *Pax6* Exerts regional control of cortical progenitor proliferation via direct repression of *Cdk6* and Hypophosphorylation of pRb. *Neuron* **78**, 269-284. doi:10.1016/j.neuron.2013.02.012
- Molnár, Z., Adams, R. and Blakemore, C.** (1998). Mechanisms underlying the early establishment of thalamocortical connections in the rat. *J. Neurosci.* **18**, 5723-5745. doi:10.1523/JNEUROSCI.18-15-05723.1998
- Molnár, Z., Garel, S., López-bendito, G., Maness, P. and Price, D. J.** (2012). Mechanisms controlling the guidance of thalamocortical axons through the embryonic forebrain. *Eur. J. Neurosci.* **35**, 1573-1585. doi:10.1111/j.1460-9568.2012.08119.x
- Ohyama, K., Tan-Takeuchi, K., Kutsche, M., Schachner, M., Uyemura, K. and Kawamura, K.** (2004). Neural cell adhesion molecule L1 is required for fasciculation and routing of thalamocortical fibres and corticothalamic fibres. *Neurosci. Res.* **48**, 471-475. doi:10.1016/j.neures.2003.12.011
- Ono, K., Clavairoly, A., Nomura, T., Gotoh, H., Uno, A., Armant, O., Takebayashi, H., Zhang, Q., Shimamura, K., Itohara, S. et al.** (2014). Development of the prethalamus is crucial for thalamocortical projection formation and is regulated by *Olig2*. *Development* **141**, 2075-2084. doi:10.1242/dev.097790
- Parish, E. V., Mason, J. O. and Price, D. J.** (2016). Expression of *Barhl2* and its relationship with *Pax6* expression in the forebrain of the mouse embryo. *BMC Neurosci.* **17**, 1-16. doi:10.1186/s12868-016-0311-6
- Piñón, M. C., Tuoc, T. C., Ashery-padan, R. and Stoykova, A.** (2008). Altered molecular regionalization and normal thalamocortical connections in cortex-specific *Pax6* knock-out mice. *J. Neurosci.* **28**, 8724-8734. doi:10.1523/JNEUROSCI.2565-08.2008
- Powell, A. W., Sassa, T., Wu, Y., Tessier-Lavigne, M. and Polleux, F.** (2008). Topography of thalamic projections requires attractive and repulsive functions of Netrin-1 in the ventral telencephalon. *PLoS Biol.* **6**, e116. doi:10.1371/journal.pbio.0060116
- Pratt, T., Vitalis, T., Warren, N., Edgar, J. M., Mason, J. O. and Price, D. J.** (2000). A role for *Pax6* in the normal development of dorsal thalamus and its cortical connections. *Development* **127**, 5167-5178.
- Price, D. J., Clegg, J., Duocastella, X. O., Willshaw, D. and Pratt, T.** (2012). The importance of combinatorial gene expression in early mammalian thalamic patterning and thalamocortical axonal guidance. *Front. Neurosci.* **6**, 37. doi:10.3389/fnins.2012.00037
- Quintana-Urzaínqui, I., Kozić, Z., Mitra, S., Tian, T., Manuel, M., Mason, J. O. and Price, D. J.** (2018). Tissue-specific actions of *Pax6* on proliferation and differentiation balance in developing forebrain are *Foxg1* dependent. *iScience* **10**, 171-191. doi:10.1016/j.isci.2018.11.031
- Rohm, B., Ottemeyer, A., Lohrum, M. and Püschel, A. W.** (2000). Plexin/neuropilin complexes mediate repulsion by the axonal guidance signal semaphorin 3A. *Mech. Dev.* **93**, 95-104. doi:10.1016/S0925-4773(00)00269-0
- Rubin, A. N., Alfonsi, F., Humphreys, M. P., Choi, C. K. P., Rocha, S. F. and Kessarlis, N.** (2011). The germinal zones of the basal ganglia but not the septum generate GABAergic interneurons for the cortex. *J. Neurosci.* **30**, 12050-12062. doi:10.1523/JNEUROSCI.6178-09.2010
- Schindelin, J., Arganda-Carreras, I., Frise, E., Kaynig, V., Longair, M., Pietzsch, T., Preibisch, S., Rueden, C., Saalfeld, S., Schmid, B. et al.** (2012). Fiji: an open-source platform for biological-image analysis. *Nat. Methods* **9**, 676-682. doi:10.1038/nmeth.2019
- Seibt, J., Schuurmans, C., Gradwohl, G., Dehay, C., Vanderhaeghen, P., Guillemot, F. and Polleux, F.** (2003). Neurogenin2 specifies the connectivity of thalamic neurons by controlling axon responsiveness to intermediate target cues. *Neuron* **39**, 439-452. doi:10.1016/S0896-6273(03)00435-5
- Simpson, T. I., Pratt, T., Mason, J. O. and Price, D. J.** (2009). Normal ventral telencephalic expression of *Pax6* is required for normal development of thalamocortical axons in embryonic mice. *Neural Dev.* **4**, 19. doi:10.1186/1749-8104-4-19
- Sousa, V. H., Miyoshi, G., Hjerling-Leffler, J., Karayannis, T. and Fishell, G.** (2009). Characterization of *Nkx6-2*-derived neocortical interneuron lineages. *Cereb. Cortex* **19**, i1-i10. doi:10.1093/cercor/bhp038
- Stoykova, A., Fritsch, R., Walther, C. and Gruss, P.** (1996). Forebrain patterning defects in Small eye mutant mice. *Development* **122**, 3453-3465.
- Takahashi, T., Fournier, A., Nakamura, F., Wang, L.-H., Murakami, Y., Kalb, R. G., Fujisawa, H. and Strittmatter, S. M.** (1999). Plexin-neuropilin-1 complexes form functional semaphorin-3A receptors. *Cell* **99**, 59-69. doi:10.1016/S0092-8674(00)80062-8
- Tamagnone, L., Artigiani, S., Chen, H., He, Z., Ming, G.-I., Song, H., Chedotal, A., Winberg, M. L., Goodman, C. S., Poo, M. et al.** (1999). Plexins are a large family of receptors for transmembrane, secreted, and GPI-anchored semaphorins in vertebrates. *Cell* **99**, 71-80. doi:10.1016/S0092-8674(00)80063-X
- Tlamsa, A. P. and Brumberg, J. C.** (2010). Organization and morphology of thalamocortical neurons of mouse ventral lateral thalamus. *Somatosens. Mot. Res.* **27**, 34-43. doi:10.3109/08990221003646736
- Tuttle, R., Nakagawa, Y., Johnson, J. E. and O'Leary, D. D.** (1999). Defects in thalamocortical axon pathfinding correlate with altered cell domains in *Mash-1*-deficient mice. *Development* **1916**, 1903-1916.
- Tyas, D. A., Simpson, T. I., Carr, C. B., Kleinjan, D. A., van Heyningen, V., Mason, J. O. and Price, D. J.** (2006). Functional conservation of *Pax6* regulatory elements in humans and mice demonstrated with a novel transgenic reporter mouse. *BMC Dev. Biol.* **6**, 1-11. doi:10.1186/1471-213X-6-21
- Vanderhaeghen, P. and Polleux, F.** (2004). Developmental mechanisms patterning thalamocortical projections: intrinsic, extrinsic and in between. *Trends Neurosci.* **27**, 384-391. doi:10.1016/j.tins.2004.05.009
- Visel, A., Thaller, C. and Eichele, G.** (2004). GenePaint.org: an atlas of gene expression patterns in the mouse embryo. *Nucleic Acids Res.* **32**, D552-D556. doi:10.1093/nar/gkh029
- Walther, C. and Gruss, P.** (1991). *Pax-6*, a murine paired box gene, is expressed in the developing CNS. *Development* **113**, 1435-1449.
- Warren, N. and Price, D. J.** (1997). Roles of *Pax-6* in murine diencephalic development. *Development* **124**, 1573-1582.
- Wright, A. G., Demyanenko, G. P., Powell, A., Schachner, M., Enriquez-barreto, L., Tran, T. S., Polleux, F. and Maness, P. F.** (2007). Close homolog of L1 and Neuropilin 1 mediate guidance of thalamocortical axons at the ventral telencephalon. *J. Neurosci.* **27**, 13667-13679. doi:10.1523/JNEUROSCI.2888-07.2007
